# Supplementary material for: Targeting PKMYT1 enhances antitumor immune responses in castration-resistant prostate cancer
Source: Research Square preprint supplement (doi:10.21203/rs.3.rs-5648993/v1), 2024-12-18
Supplement: Supplementary file 1 [file 589cbd3924dc38a9cb54c906.pdf]

Supplementary Information for

**Targeting PKMYT1 enhances antitumor immune responses in  
castration-resistant prostate cancer**

Lin Gao<sup>1,2</sup>, Baozhen Wang<sup>1</sup>, Hui Liu<sup>3</sup>, Ping Liu<sup>1</sup>, Long Liu<sup>3</sup>, Jingying Han<sup>1</sup>, Xin Wang<sup>1</sup>, Baokai Dou<sup>4</sup>, Wenyao Liu<sup>3</sup>, Xinpei Wang<sup>1</sup>, Feifei Sun<sup>1</sup>, Tingting Feng<sup>1</sup>, Ru Zhao<sup>3</sup>, Weiwen Chen<sup>2</sup>, Jing Hu<sup>3</sup> ✉ and Bo Han<sup>1,3,5</sup> ✉

Corresponding author

Jing Hu, Email: [201420420@mail.sdu.edu.cn](mailto:201420420@mail.sdu.edu.cn)

Bo Han, Email: [boh@sdu.edu.cn](mailto:boh@sdu.edu.cn)

The PDF file includes:

Supplementary Figure 1 to 13

Supplementary Table 1 to 4

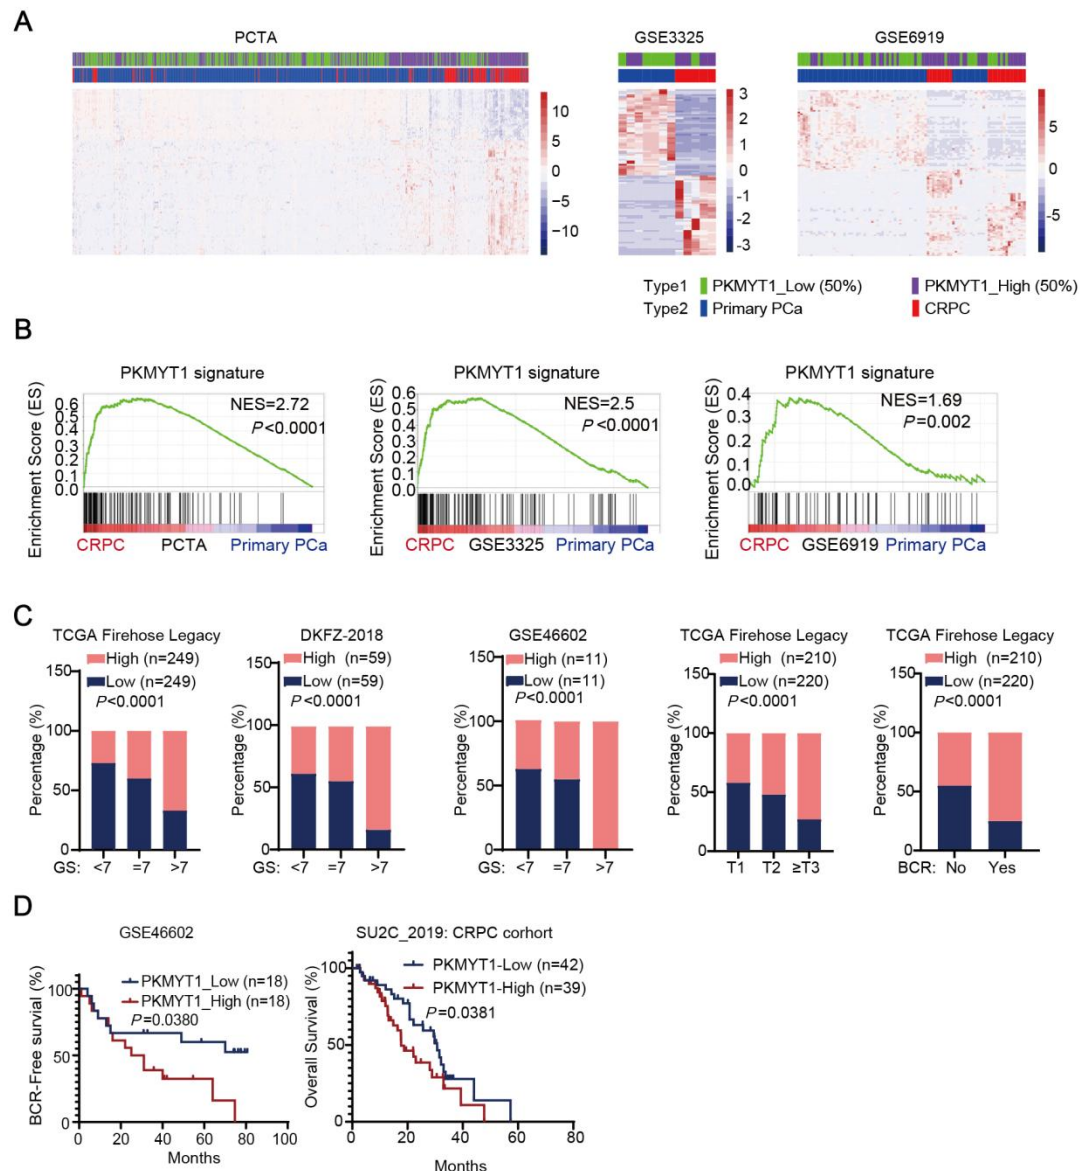

**Supplementary Fig.1 PKMYT1 expression is elevated in CRPC and is related with the progression of PCa.**

**A.** Unsupervised clustering analyses of PCTA, GSE3325, and GSE6919 datasets based on differential expression genes of primary PCa and CRPC tissues. Patients' status were shown in the annotation column. Patients were categorized according to PKMYT1 expression or PCa risk assessment. Green: patients with low PKMYT1 expression (50% cutoff); Purple: patients with high PKMYT1 expression (50% cutoff); Blue: patients with primary PCa (Primary PCa); Red: patients with CRPC.

**B.** Enrichment of PKMYT1 signatures analyzed by GSEA. GSEA analysis was performed to determine the enrichment of PKMYT1 related gene sets in gene expression dataset profiling CRPC and primary PCa in indicated datasets.

**C.** The relationship between PKMYT1 expression and gleason score, different TNM

stages and biochemical recurrence in indicated datasets.

**D.** Kaplan–Meier survival analysis of PCa cases from GSE46602 and SU2C-2019. PCa cases in GSE46602 and SU2C-2019 datasets were stratified based on PKMYT1 expression levels, and analyzed for disease-free survival. The  $P$  values for Kaplan-Meier curves were determined using a log-rank test.

$*P < 0.05$ ,  $**P < 0.01$ ,  $***P < 0.001$ .

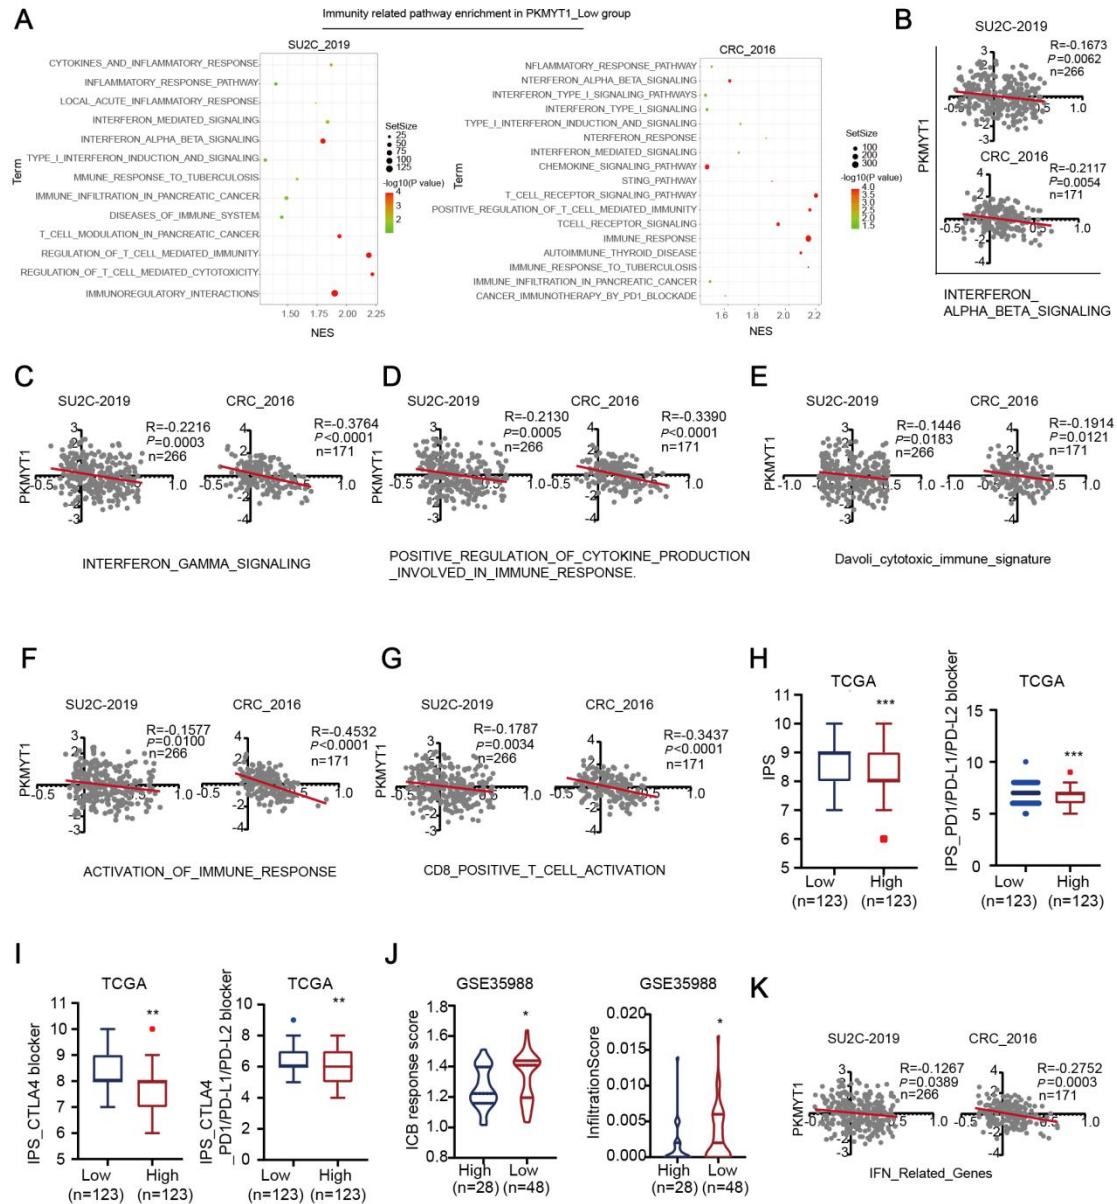

**Supplementary Fig.2 PKMYT1 expression is associated with type I and II interferon signaling and ICB response in CRPC.**

**A.** Immune related signatures enriched in CRPC cases with PKMYT1 different expression. Immune related signatures download from WP pathway, REACTOME and KEGG were analyzed and shown in bubble plot.

**B-G.** The relationship between interferon-alpha-beta signaling, interferon-gamma signaling, cytokine production involved in immune response, cytotoxic-immune signature, activation of immune response, CD8 positive T cell activation and PKMYT1 expression in CRPC cases from SU2C-2019 and CRC-2016 datasets. Gene sets from Molecular Signatures Database v7.4 (MSigDB, <https://www.gsea-msigdb.org/gsea/msigdb>) was performed ssGSEA function from GSVA package 1.38.2 to estimates pathway enrichment scores, then enrichment

scores were performed Z score normalization cross all samples. Correlation analysis between normalized gene expression and normalized single sample gene set enrichment scores was performed.

**H-I.** The relationship between IPS and PKMYT1 expression levels in PCa cases. The IPS, IPS-PD1/PD-L1/PD-L2 and IPS-CTLA4 were evaluated in TCIA database (<https://tcia.at/home>).

**J.** The relationship between of ICB response score and PKMYT1 expression in GSE35988 analyzed by immuneAI.

**K.** The relationship between IFN signature and PKMYT1 expression in CRPC cases from SU2C-2019 and CRC-2016 datasets.

$*P < 0.05$ ,  $**P < 0.01$ ,  $***P < 0.001$ ,  $****P < 0.0001$ .

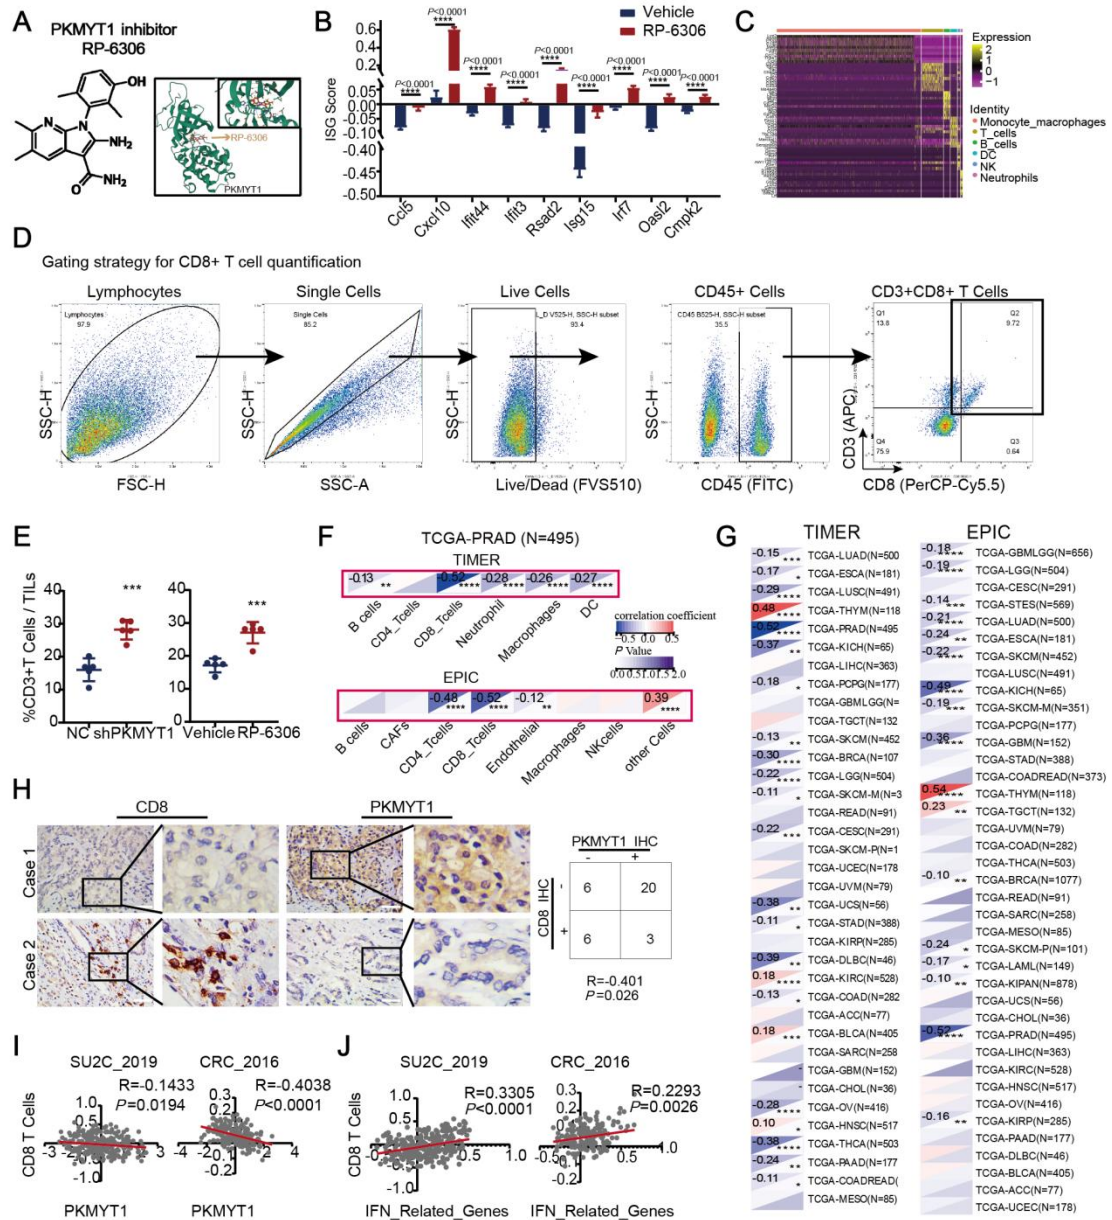

**Supplementary Fig.3 Targeting PKMYT1 promotes CD8+ T infiltration.**

- The structure of RP-6306.
- ISGs score in RM-1 tumors with indicated treatment analyzed by scRNA-seq.
- The heatmap of immune cells in RM-1 tumors.
- Gating strategy for CD8+ T cell quantification.
- The percentage of CD3+ T cells in CD45+ cells analyzed by flow-cytometry.
- The relationship between immune cell infiltration and PKMYT1 expression levels in PCa analyzed by TIMER and EPIC database.
- The relationship between CD8+ T cell infiltration and PKMYT1 expression in pan-cancer analyzed by TIMER and EPIC database.
- Representative IHC images and quantitative analysis for PKMYT1 and CD8 expression in PCa cases in Qilu hospital. Contingency table for PKMYT1 expression

status by IHC in CRPC cases in Qilu hospital. Scale bars, 50  $\mu$ m.

**I-J.** The relationship between CD8<sup>+</sup> T cell infiltration and PKMYT1, IFN-related genes expression in CRPC cases from SU2C-2019 and CRC-2016 datasets. Immune cell marker genes list was performed ssGSEA function from GSVA package 1.38.2 to estimates immune cell enrichment scores, then enrichment scores were performed Z score normalization cross all samples. Correlation analysis between normalized gene expression and normalized single sample gene set enrichment scores was performed.

\* $P < 0.05$ , \*\* $P < 0.01$ , \*\*\* $P < 0.001$ , \*\*\*\* $P < 0.0001$ .



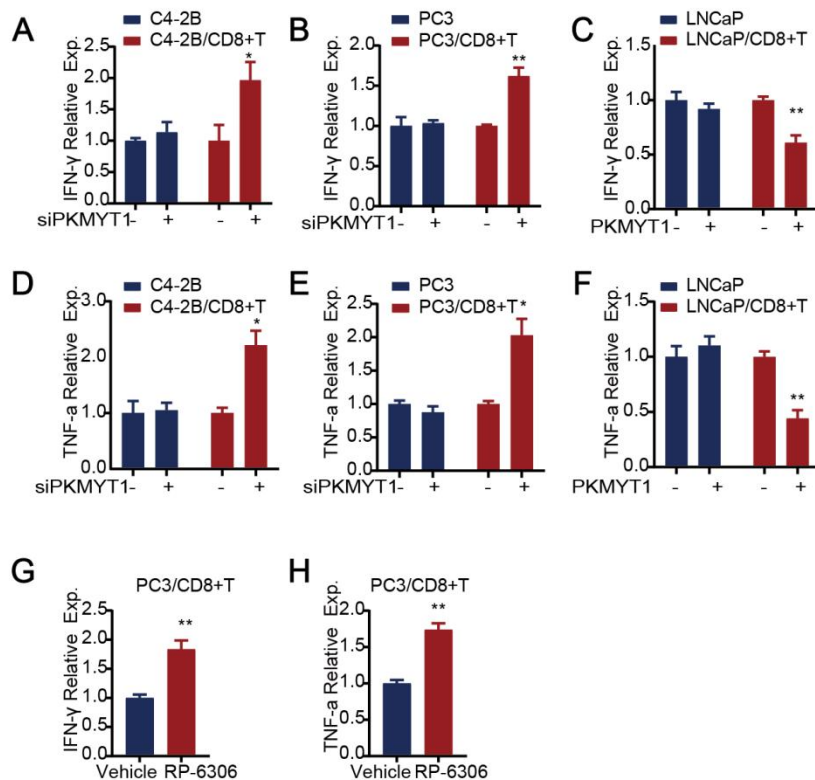

**Supplementary Fig.4 Targeting PKMYT1 promotes CD8+ T cell activation.**

**A-F.** IFN- $\gamma$  and TNF- $\alpha$  levels analyzed by cytokine ELISAs. C4-2B and PC3 cells transfected siPKMYT1 while LNCaP cells transfected PKMYT1, were cocultured with CD8+ T cells for 24h. Cocultured media were analyzed for IFN- $\gamma$  and TNF- $\alpha$ . The error bars indicate the mean $\pm$ SEM of three independent assays (student *t* test).

**G-H.** IFN- $\gamma$  and TNF- $\alpha$  levels analyzed by cytokine ELISAs. PC3 cells treated with 500nM RP-6306, were cocultured with CD8+ T cells for 24h. Cocultured media were analyzed for IFN- $\gamma$  and TNF- $\alpha$ . The error bars indicate the mean $\pm$ SEM of three independent assays (student *t* test).

\**P* < 0.05, \*\**P* < 0.01.



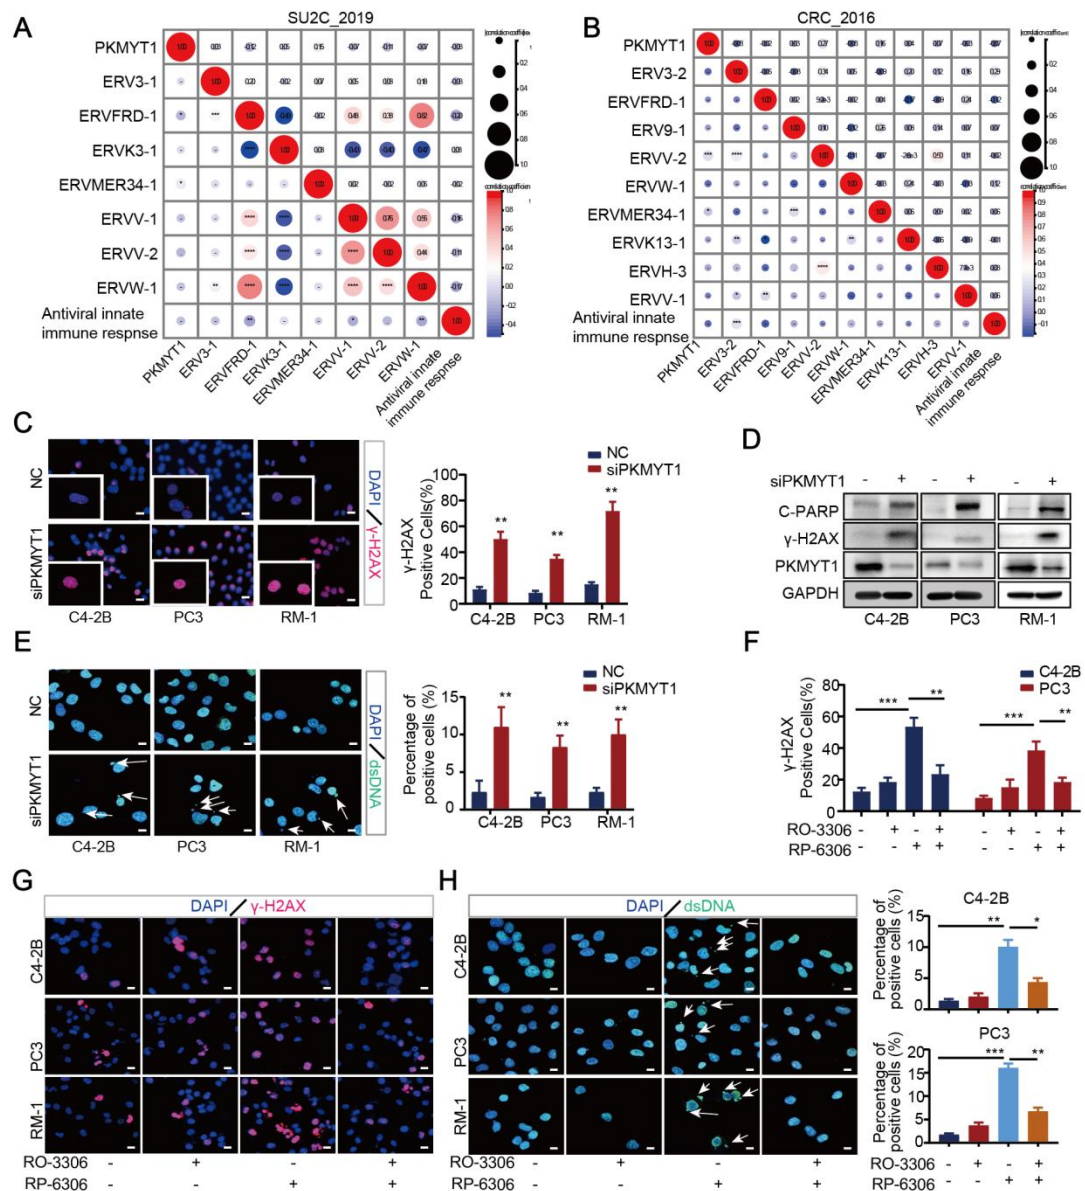

**Supplementary Fig.5 Targeting PKMYT1 increased DNA damages accumulation and cytoplasmic dsDNA levels.**

**A-B.** The relationship between ERV related genes and PKMYT1 expression in CRPC cases from SU2C-2019 and CRC-2016 datasets.

**C.** IF staining analysis of  $\gamma$ -H2AX expression in PCa cells with indicated transfection. Percentage of  $\gamma$ -H2AX positive cells was shown in right panel. Scale bars, 20 $\mu$ m.

**D.** Western blot analysis of C-PARP and  $\gamma$ -H2AX expression in PCa cells with PKMYT1 knockdown.

**E.** Representative images of dsDNA staining in indicated PCa cells transfected with siPKMYT1(left panel), and quantitative analysis of dsDNA staining in PCa cells with PKMYT1 knockdown (right panel). Data represent mean $\pm$ SEM of three independent experiments. Scale bars, 10 $\mu$ m.

**F-G.** Images and the percentage of  $\gamma$ -H2AX positive cells in indicated cells with 5 $\mu$ M

RO-3306 and 500nM RP-6306 treatment for 24h. Scale bars, 20μm.

**H.** Images and the percentage of dsDNA positive cells in indicated cells with 5μM RO-3306 and 500nM RP-6306 treatment for 24h. Scale bars, 10μm.

\* $P < 0.05$ , \*\*\* $P < 0.001$ , \*\*\*\* $P < 0.0001$ .

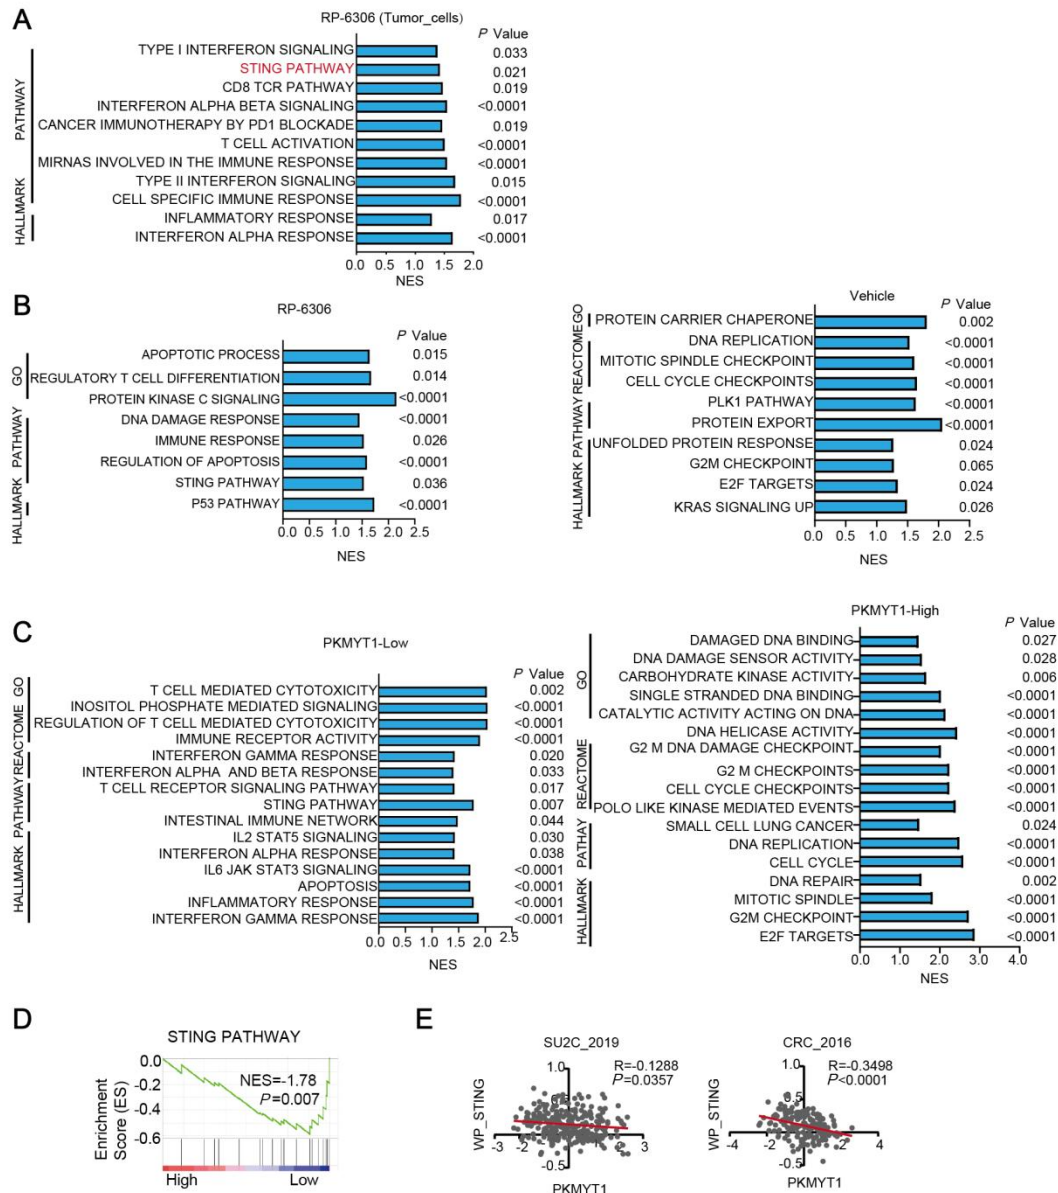

**Supplementary Fig.6 PKMYT1-related signaling pathways in CRPC cells.**

**A.** GSEA analysis of scRNA-seq profiles in epithelial cell cluster with RP-6306 treatment in RM-1 tumors.

**B-C.** GSEA of enriched gene sets in C4-2B cells treated with 500nM RP-6306 for 24h, and GSEA analysis from microarray datasets of GSE35988 that profiled CRPC cases with different levels of PKMYT1 expression. Gene sets from the Hallmark, KEGG, REACTOME and GO platforms were output by GSEA. NES, Normalized Enrichment Score.

**D.** Enrichment of STING pathway analyzed by GSEA in RNA-seq data for CRPC patients with PKMYT1 high and low expression in GSE35988 datasets.

**E.** The relationship between STING pathway signature and PKMYT1 expression in CRPC cases from SU2C-2019 and CRC-2016 datasets.

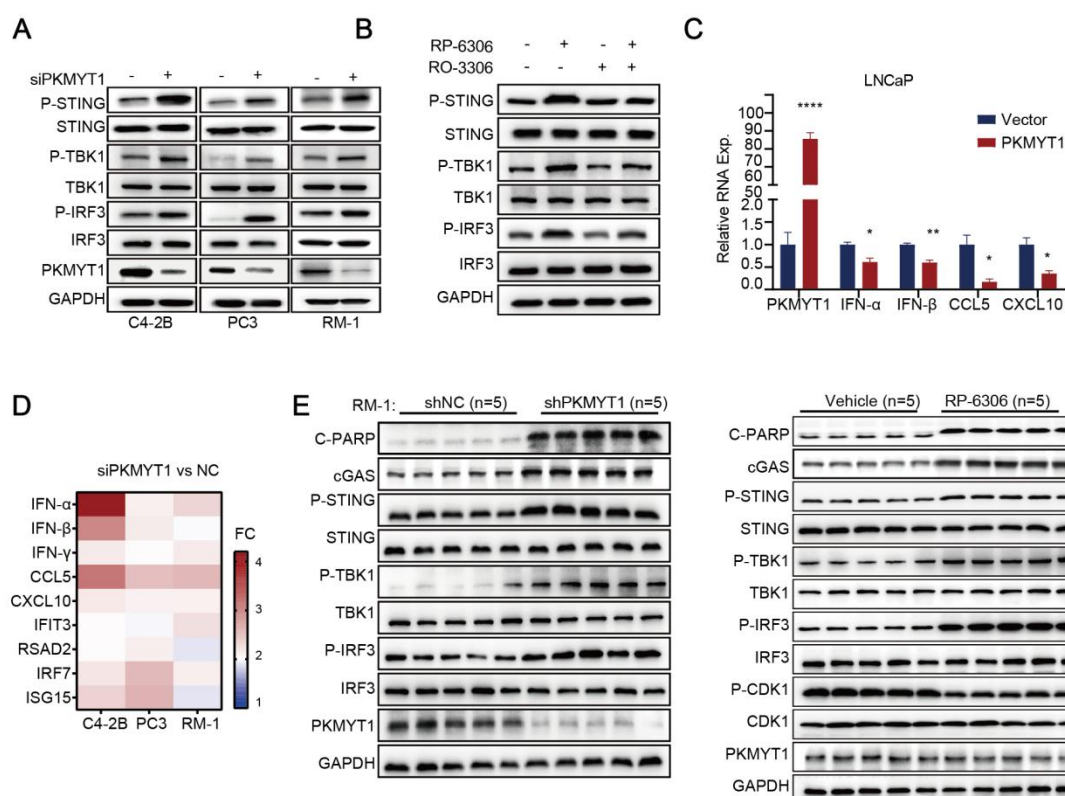

**Supplementary Fig.7 PKMYT1 inhibition regulates the activity of STING signaling.**

**A.** Western blots showing the protein expression of STING pathway, phosphorylated and total STING, TBK1, IRF3, and GAPDH (loading control) in indicated PCa cells with PKMYT1 knockdown.

**B.** Western blots showing the protein expression of STING pathway in RM-1 cells with indicated treatment.

**C.** RT-qPCR analysis of IFN-α, IFN-β, CCL5 and CXCL10 in LNCaP cells expressed PKMYT1.

**D.** Fold changes of IFNs and ISGs expression levels in indicated PCa cells with PKMYT1 knockdown analyzed by RT-qPCR.

**E.** Expression of STING pathway related proteins in RM-1 tumors with indicated treatment. Tumors dissected from C57BL/6 mice bearing RM-1 cells, and subjected to protein extraction. The indicated protein expression levels were measured by western blot assays.

\* $P < 0.05$ , \*\* $P < 0.01$ , \*\*\* $P < 0.001$ , \*\*\*\* $P < 0.0001$ .

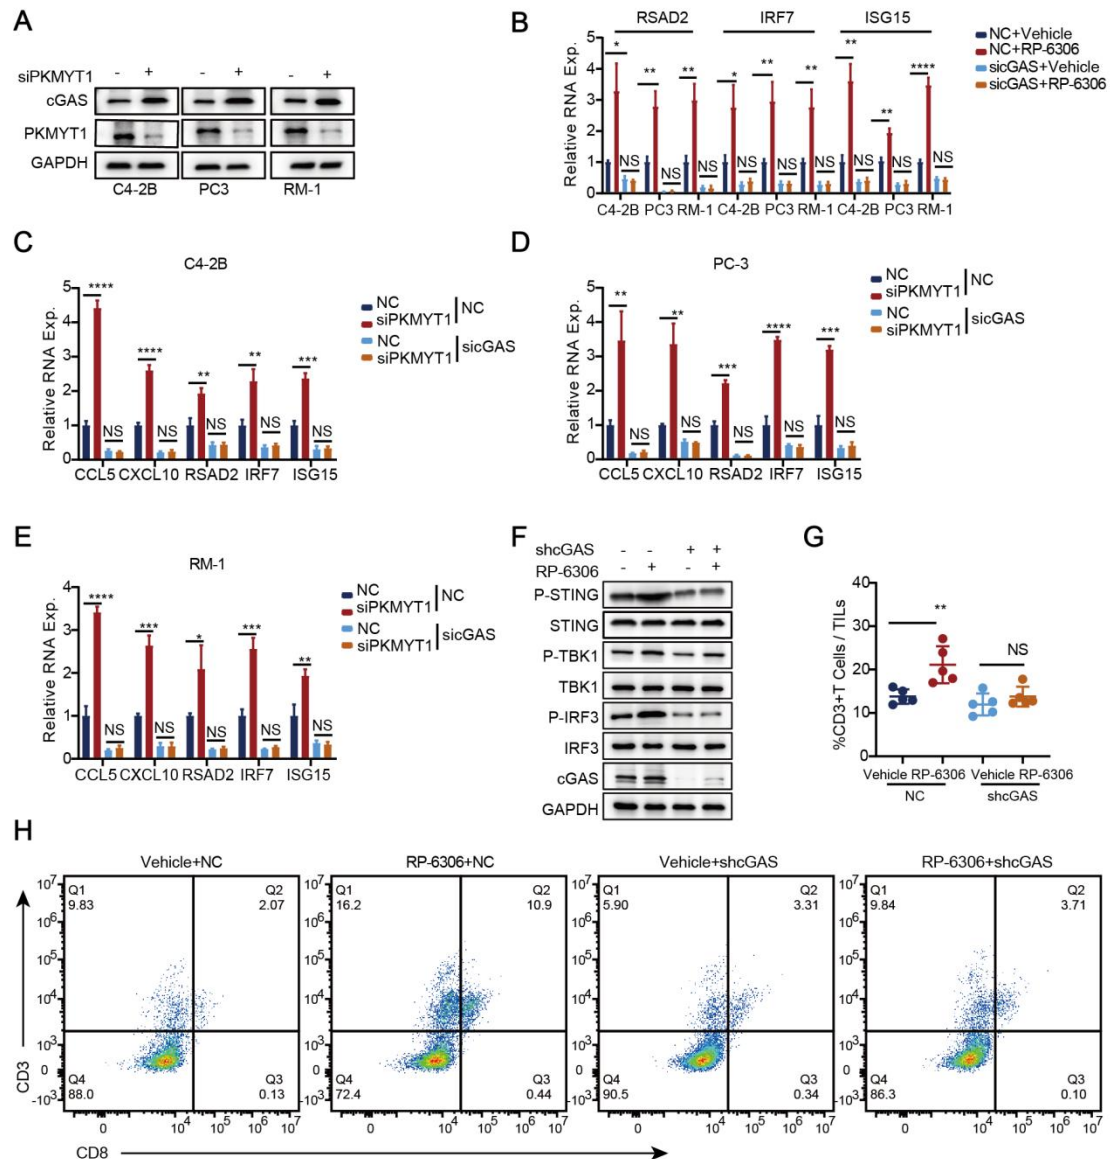

**Supplementary Fig.8 PKMYT1 inhibition regulates the activity of STING signaling in a cGAS-dependent manner.**

**A.** Protein levels of cGAS in indicated PCa cells with PKMYT1 knockdown.

**B-E.** RT-qPCR analysis of ISGs levels in PCa cells with indicated treatment.

**F.** The protein expression levels of STING pathway measured western blot assays in RM-1 tumors with indicated treatment.

**G.** Percentage of CD3+ T cells in CD45+ T cells analyzed by flow-cytometry assays in RM-1 tumors. RM-1 tumors were harvested at day 10 for immune profiling by flow cytometry. Flow-cytometry analysis of CD45+CD3+ total T cells in the tumors are shown.

**H.** Images of CD8+ T cells analyzed by flow-cytometry assays in indicated RM-1 tumors.

\* $P < 0.05$ , \*\* $P < 0.01$ , \*\*\* $P < 0.001$ .

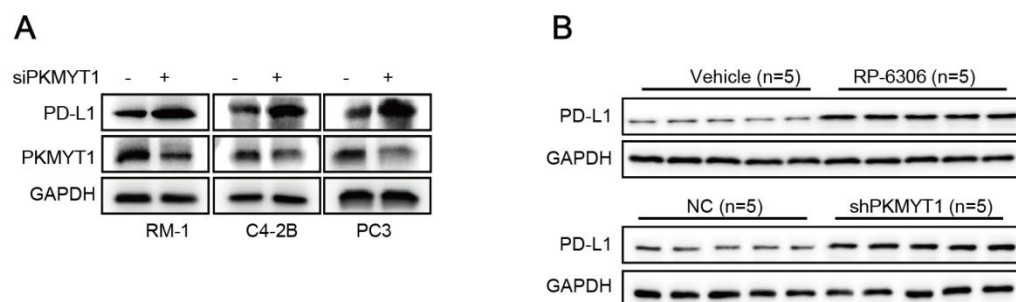

**Supplementary Fig.9 PKMYT1 inhibition increases the protein expression of PD-L1.**

**A-B.** PD-L1 expression analyzed by western blot assay in PCa cells and RM-1 tumors with indicated treatment.



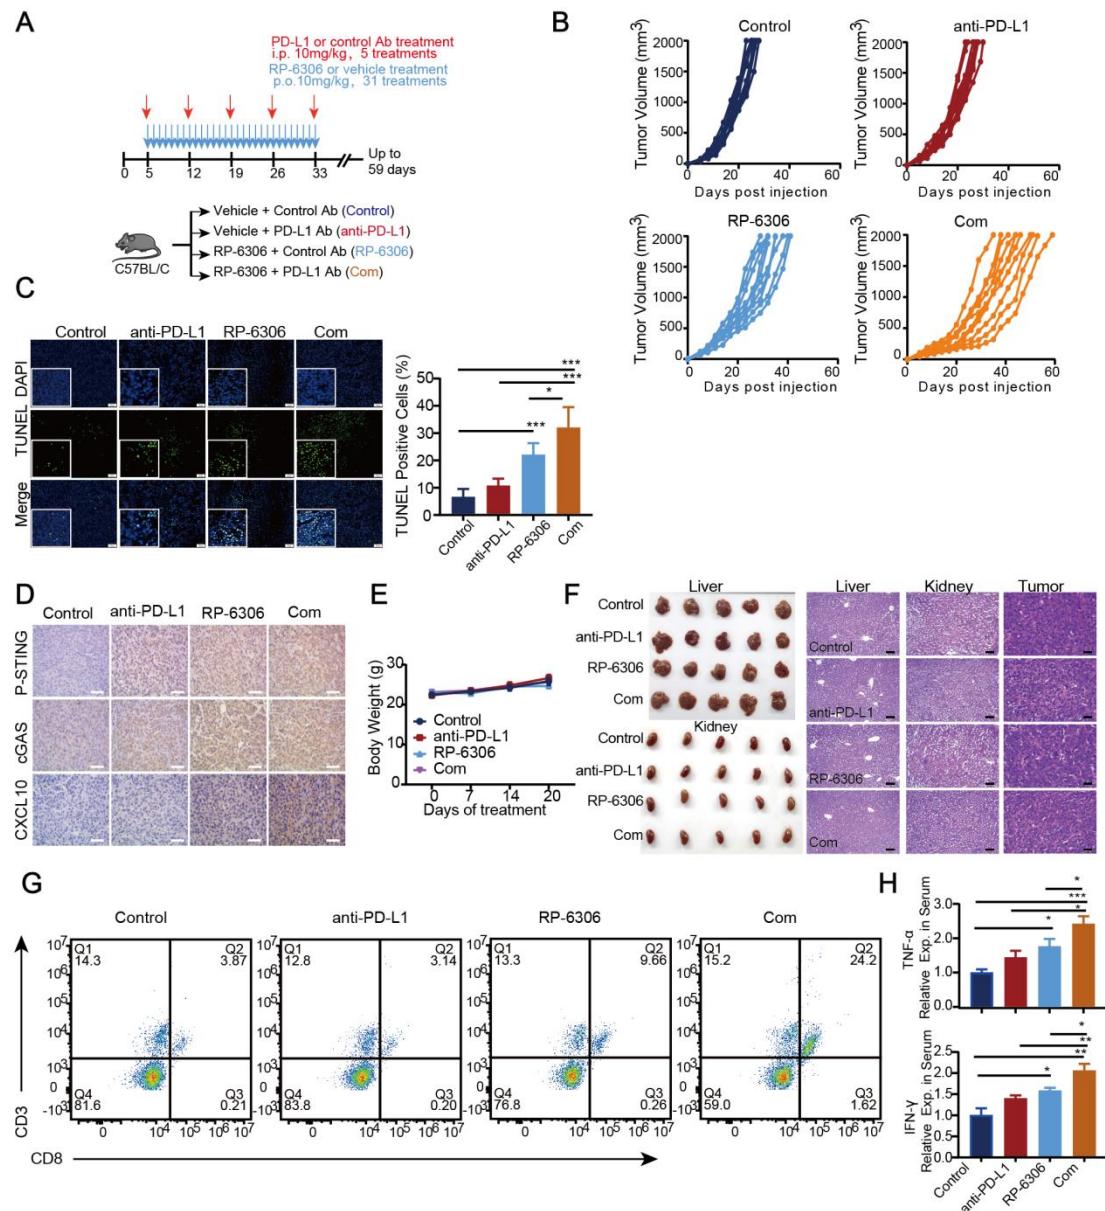

**Supplementary Fig.10 RP-6306 enhances the antitumor immune response to PD-L1 blockade in mouse model.**

**A.** A schematic model that illustrated the treatment plan for mice bearing subcutaneous RM-1 tumors.

**B.** Tumor volumes of RM-1 syngeneic tumors treated with control (dark blue lines; n = 10), anti-mouse PD-L1 antibodies (red lines; n = 10), RP-6306 (light blue lines; n = 10), and combination of RP-6306 and anti-mouse PD-L1 antibodies (yellow lines; n = 10) plotted individually.

**C.** Images of TUNEL staining performed in RM-1 tumor tissues. Quantitative analysis of TUNEL staining in RM-1 tumors with indicated treatment were shown in right panel. Scale bars, 50μm.

**D.** Representative IHC images of P-STING, cGAS and CXCL10 in tumors in each group. Scale bars, 50μm.



**E.** Body weight of RM-1 tumor-bearing mice in each group.

**F.** Drug toxicity in vital organs in each group. The livers and kidneys were photographed and stained with H/E in each group. Scale bars, 200 $\mu$ m.

**G.** Images of CD8<sup>+</sup> T cells analyzed by flow-cytometry assays in indicated RM-1 tumors.

**H.** IFN- $\gamma$  and TNF- $\alpha$  levels of serum analyzed by ELISA. Circulating serum from indicated C57BL/6 mice was analyzed for IFN- $\gamma$  and TNF- $\alpha$  by cytokine ELISAs. The error bars indicate the mean  $\pm$  SEM of three independent assays.

\* $P < 0.05$ , \*\* $P < 0.01$ , \*\*\* $P < 0.001$ , \*\*\*\* $P < 0.0001$ .

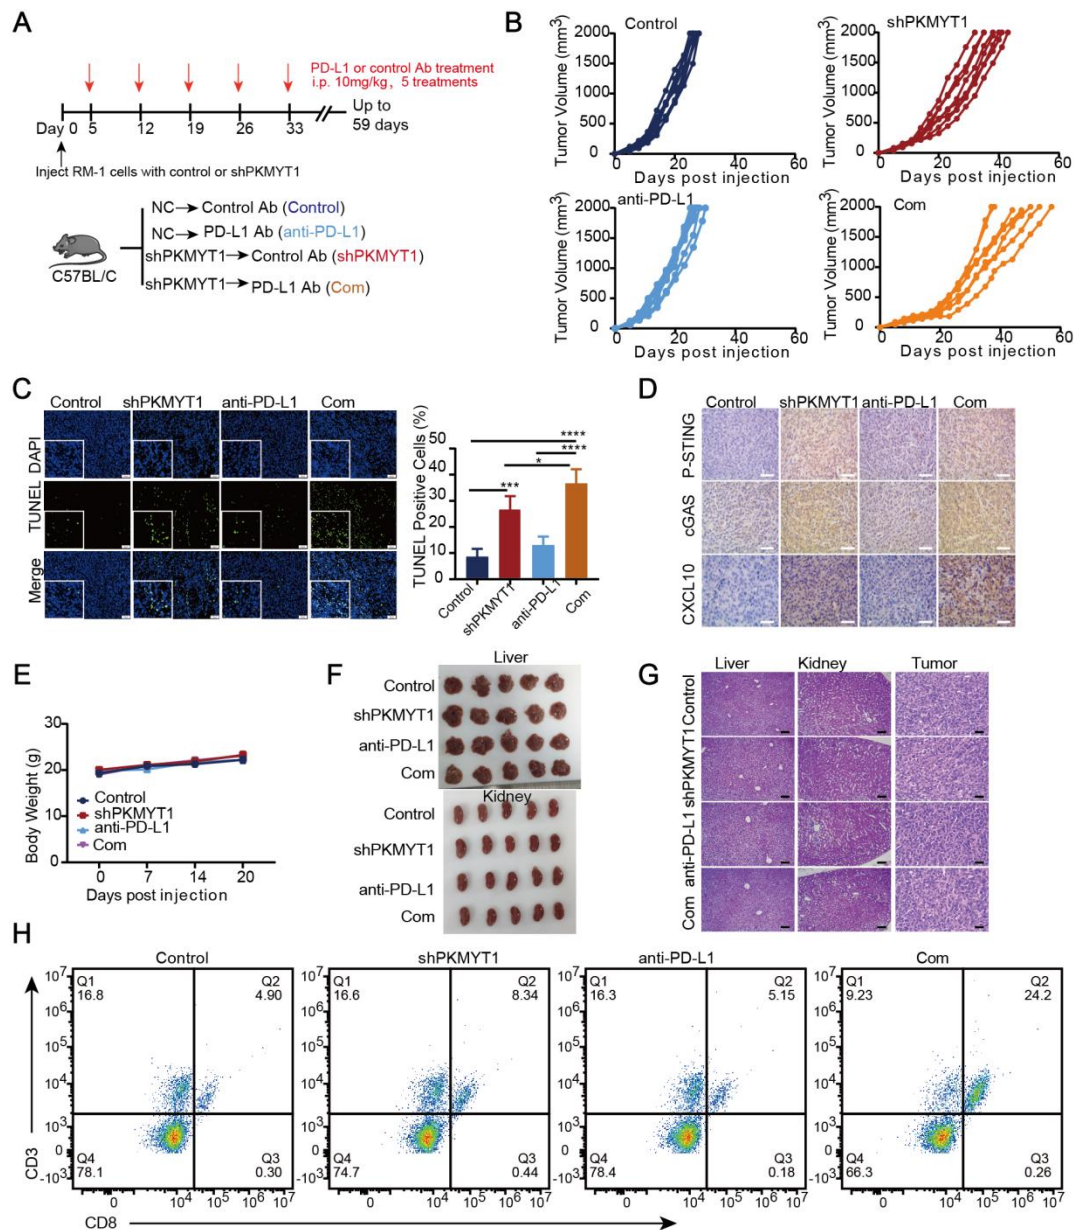

**Supplementary Fig.11 PKMYT1 knockdown enhances the antitumor immune response to PD-L1 blockade in mouse model.**

**A.** A schematic model that illustrated the treatment plan for mice bearing subcutaneous RM-1 tumors.

**B.** Tumor volumes of RM-1 syngeneic tumors treated with control (dark blue lines; n = 8), shPKMYT1 (red lines; n = 8), anti-mouse PD-L1 antibodies (light blue lines; n = 8), and combination of shPKMYT1 and anti-mouse PD-L1 antibodies (yellow lines; n = 8) plotted individually.

**C.** Images and quantitative analysis of TUNEL staining performed in RM-1 tumor tissues. Scale bars, 50μm.

**D.** Representative IHC images of P-STING, cGAS and CXCL10 in tumors in each group. Scale bars, 50μm.

**E.** Body weight of RM-1 tumor-bearing mice in each group.

**F-G.** Drug toxicity in vital organs in each group. The livers and kidneys were photographed and stained with H/E in each group. Scale bars, 200 $\mu$ m.

**H.** Images of CD8<sup>+</sup> T cells analyzed by flow-cytometry assays in indicated RM-1 tumors.

\* $P < 0.05$ , \*\* $P < 0.01$ , \*\*\* $P < 0.001$ , \*\*\*\* $P < 0.0001$ .

Supplementary Fig.12 Images for the flow cytometry results.

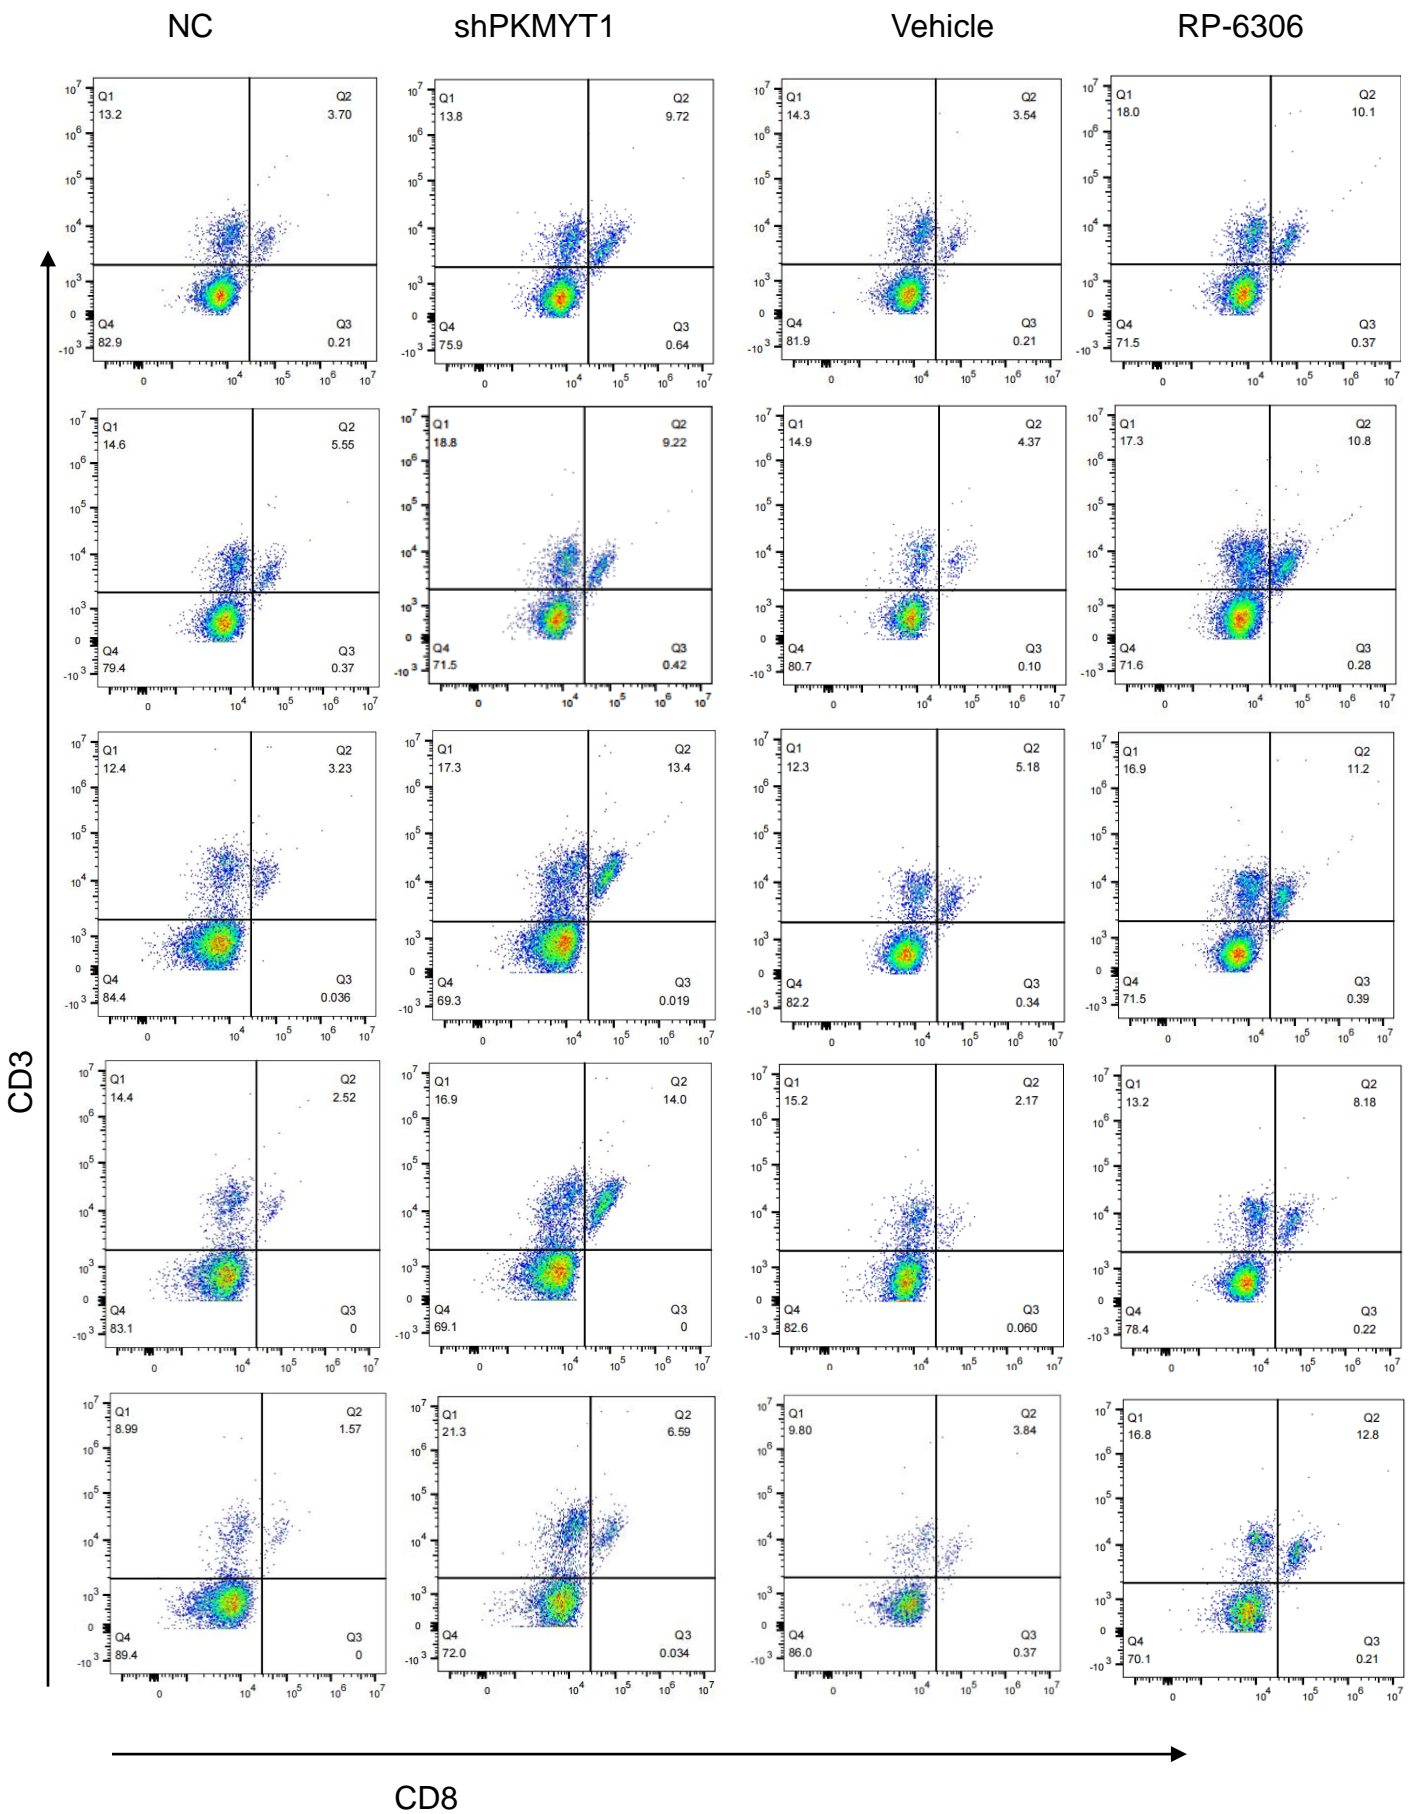

NC+Vehicle

NC+RP-6306

shcGAS+Vehicle

shcGAS+ RP-6306

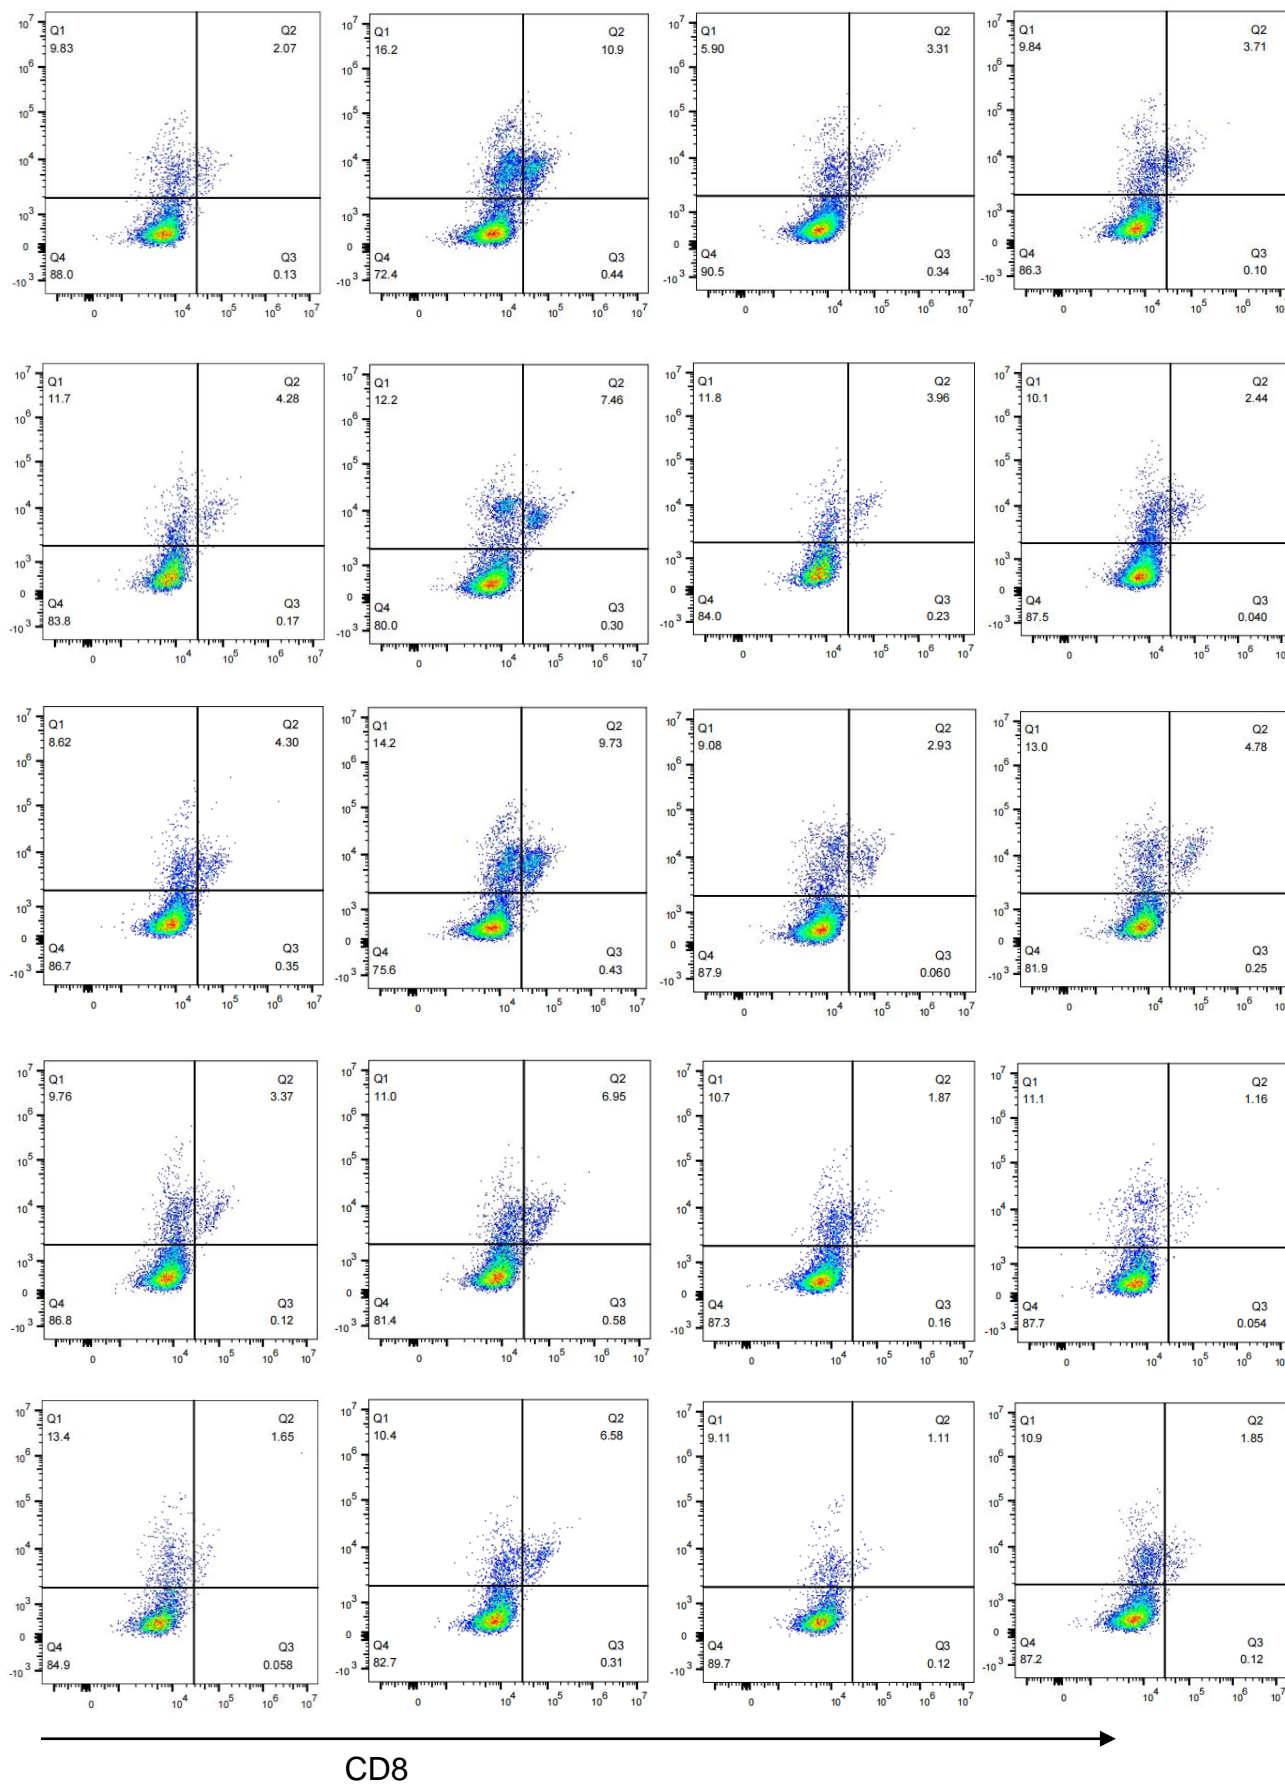



Control

anti-PD-L1

RP-6306

Com

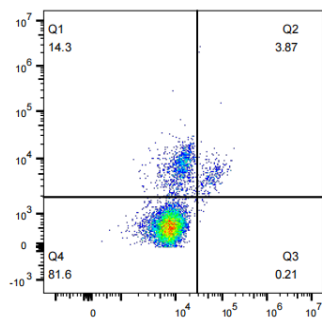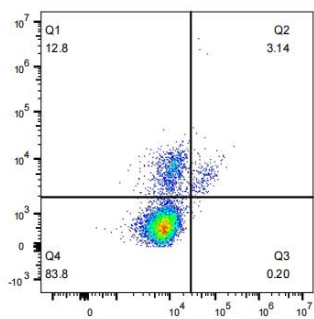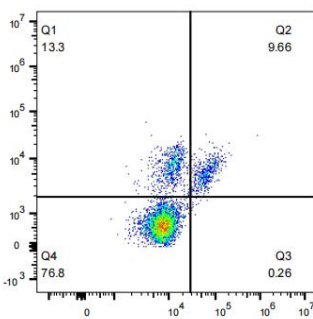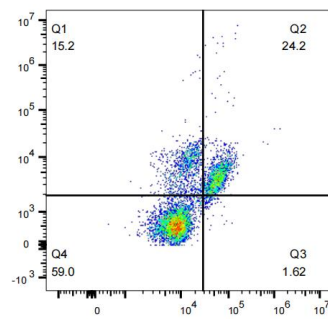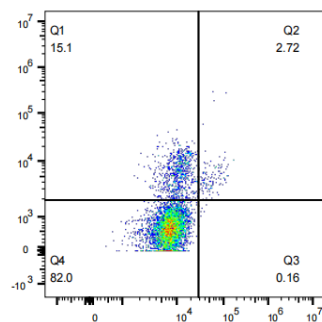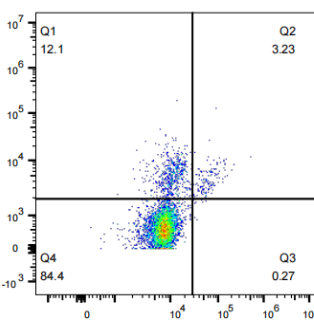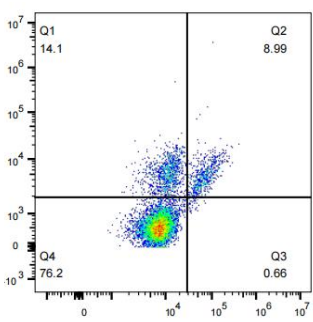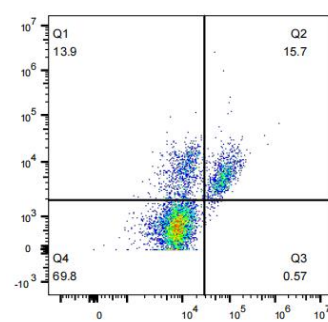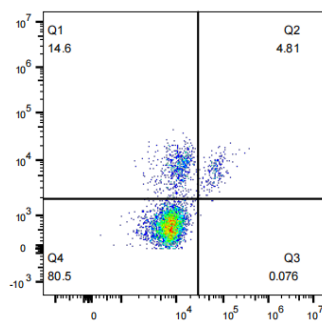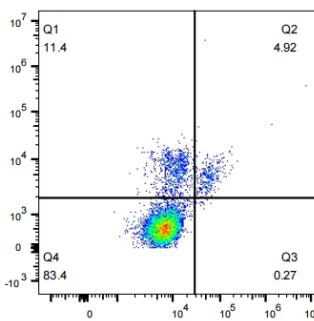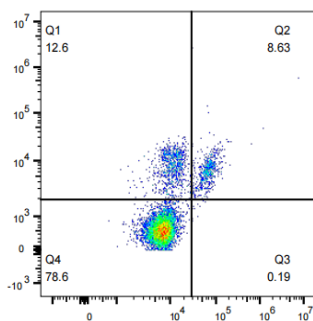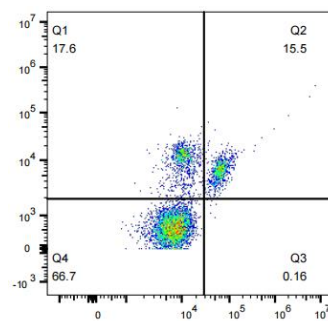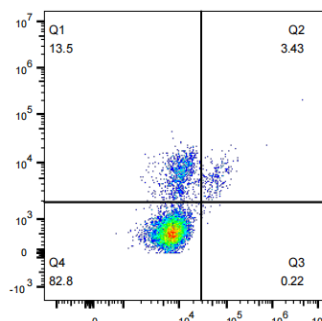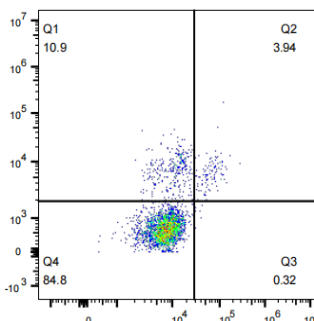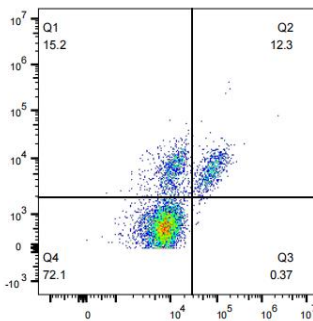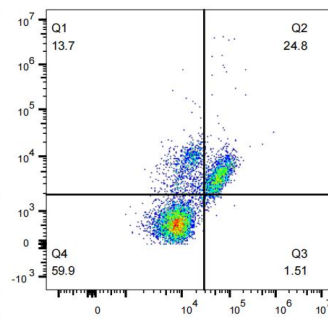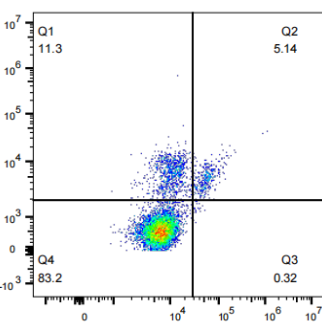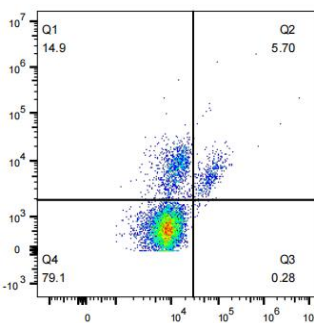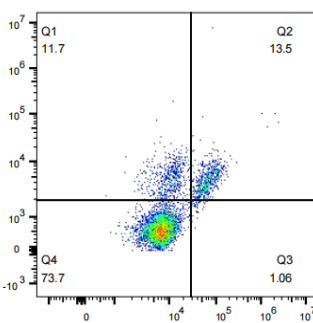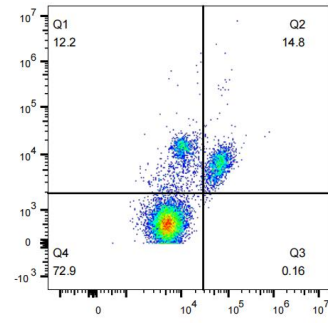

CD3

CD8

Control

shPKMYT1

anti-PD-L1

Com

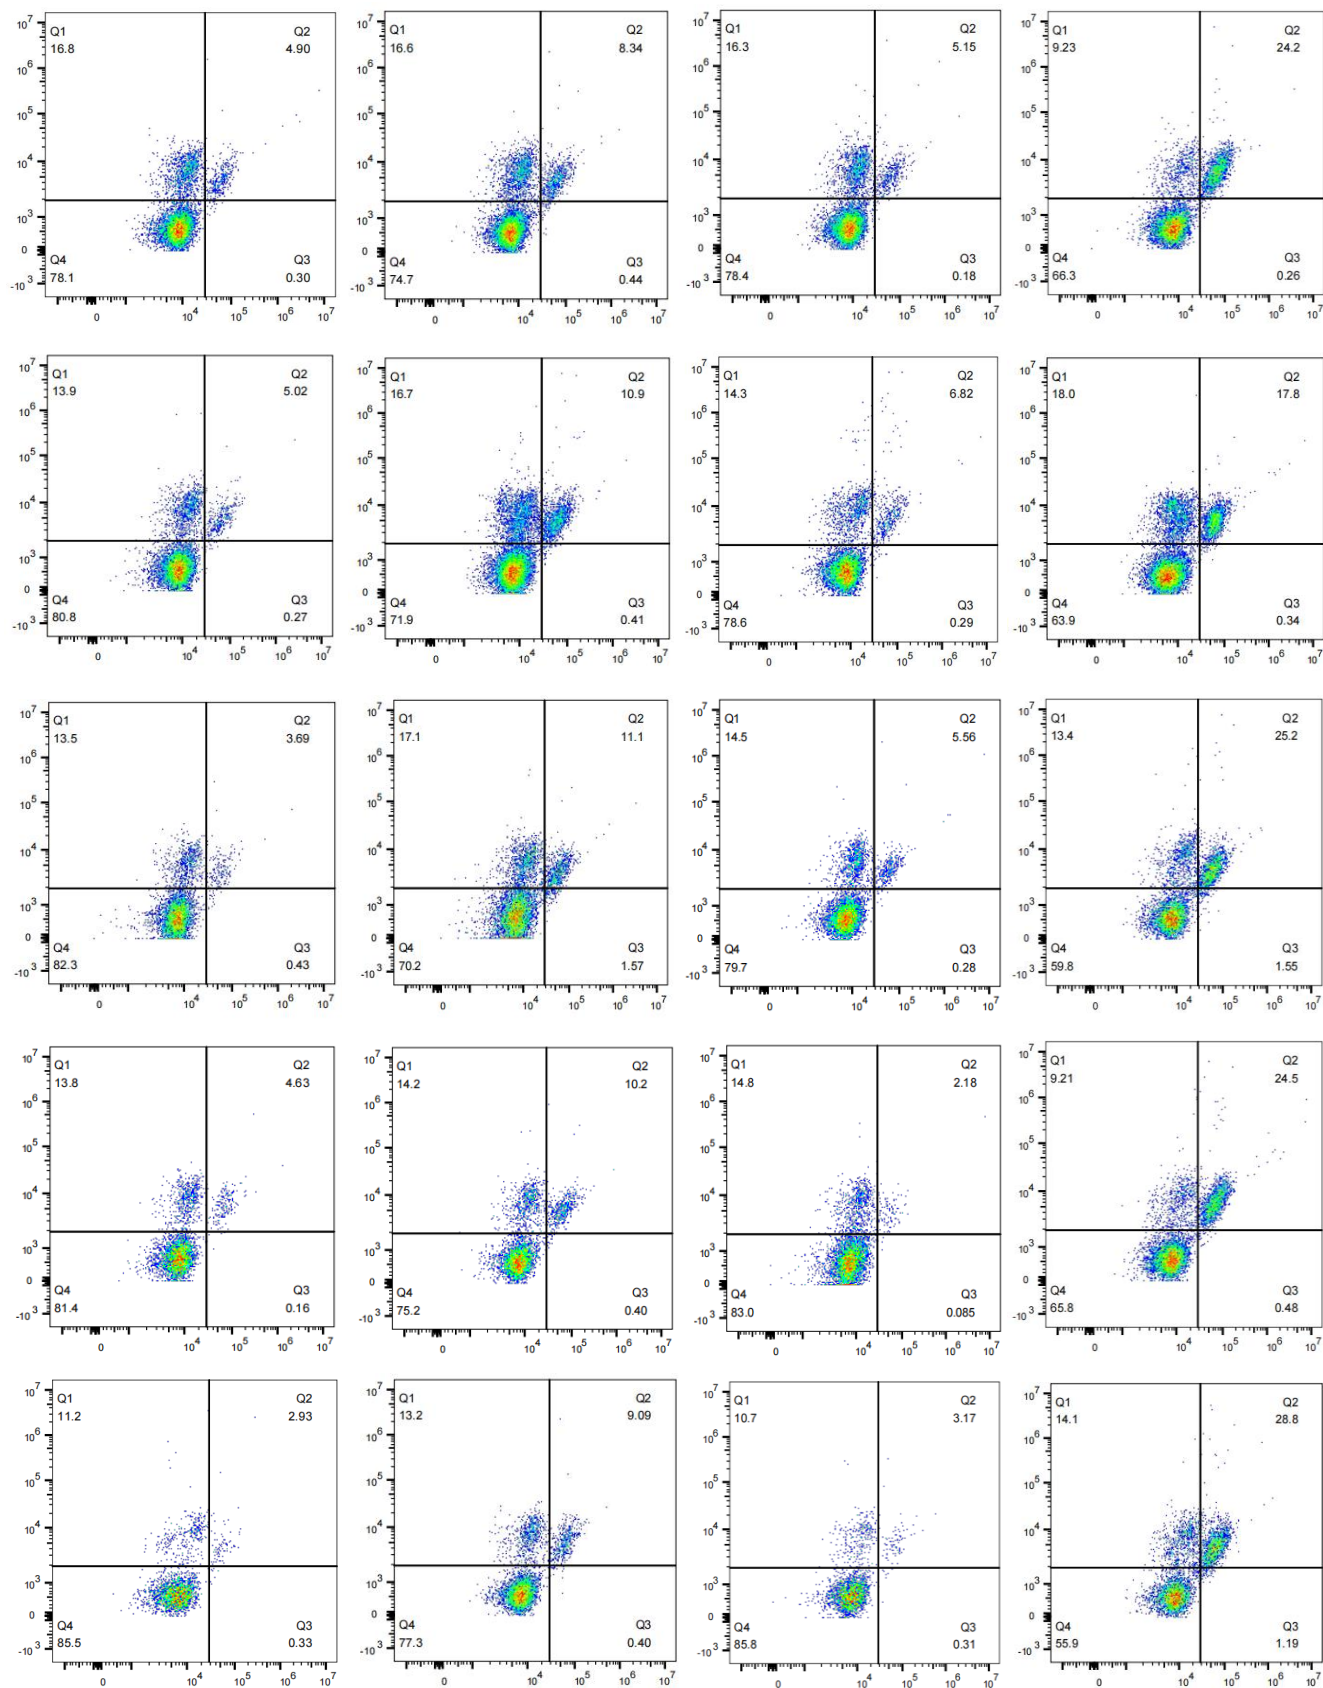

CD8



**Fig4E**

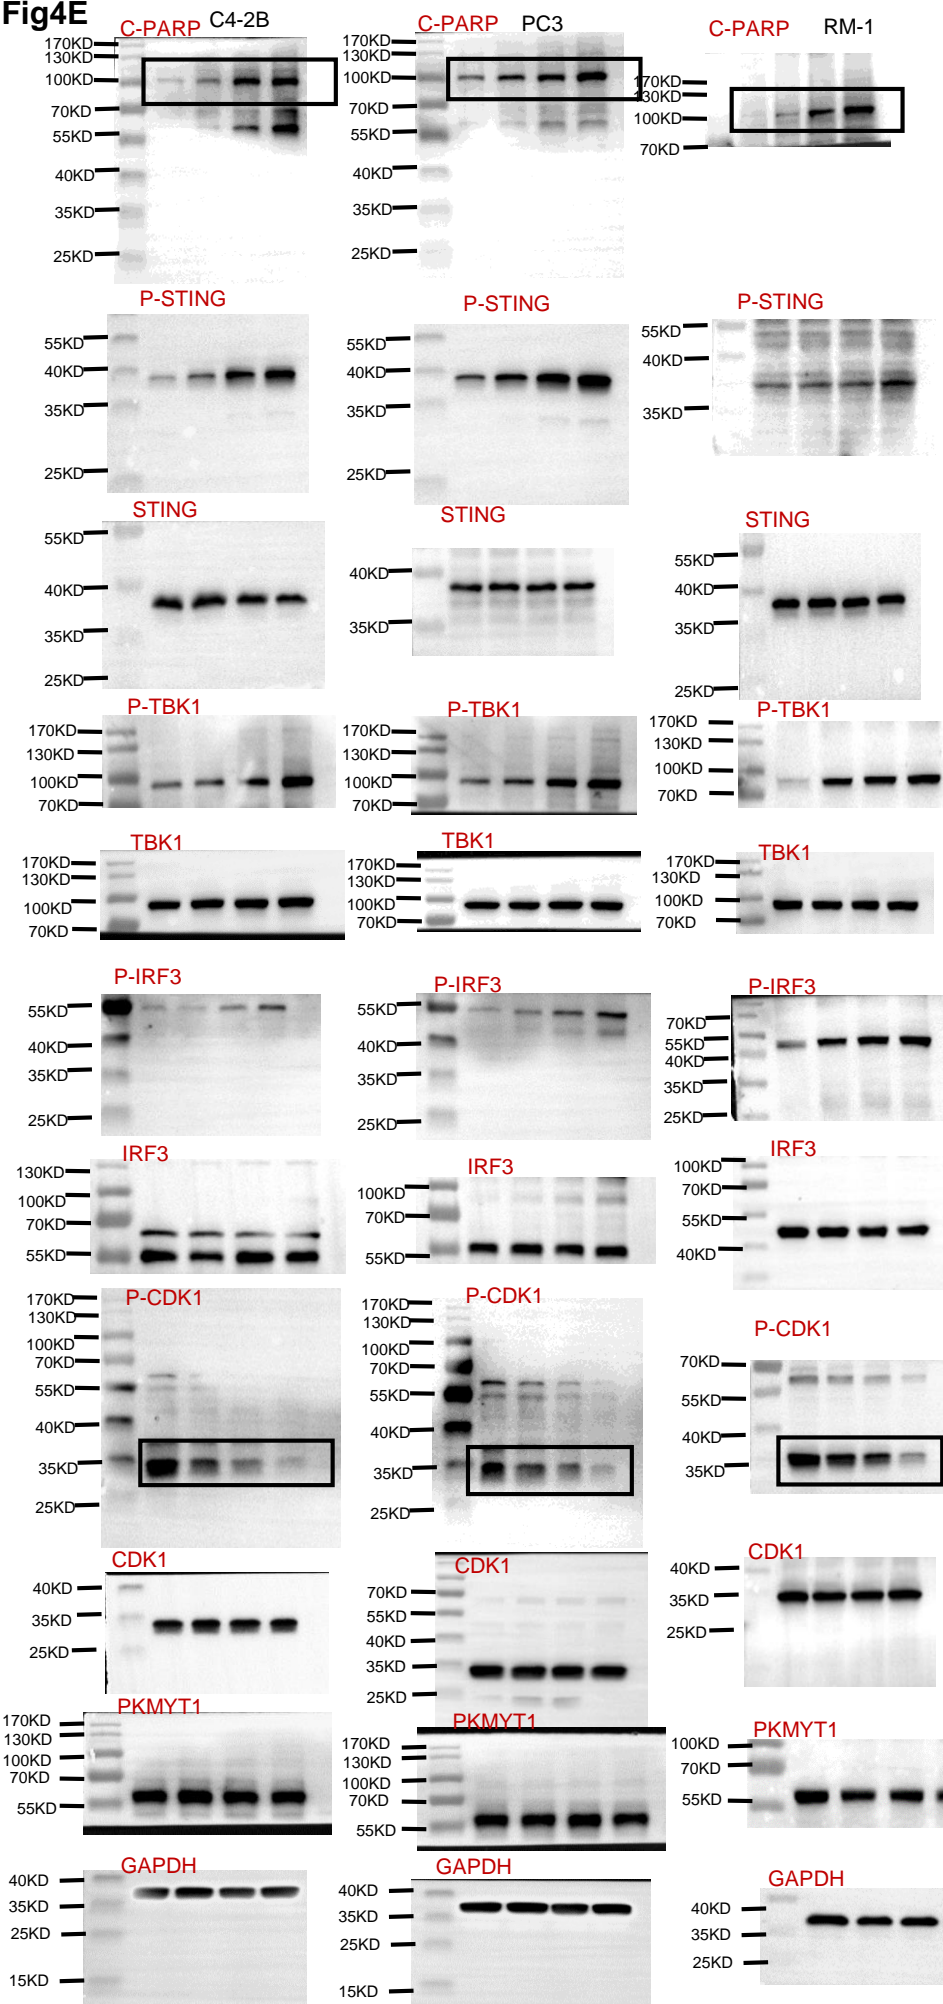

**Fig4G**

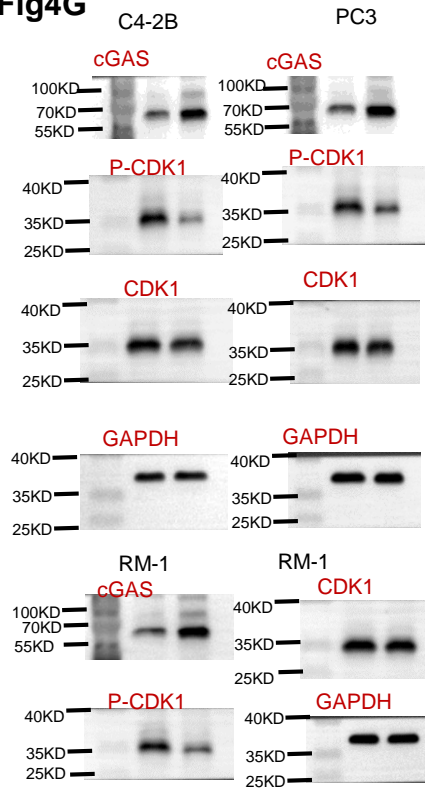

**Fig4J**

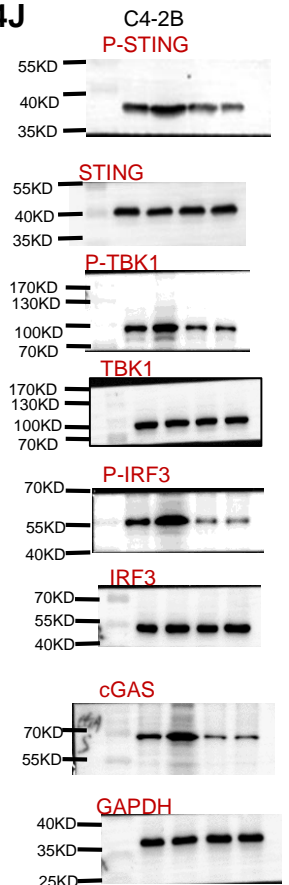

**Fig4J**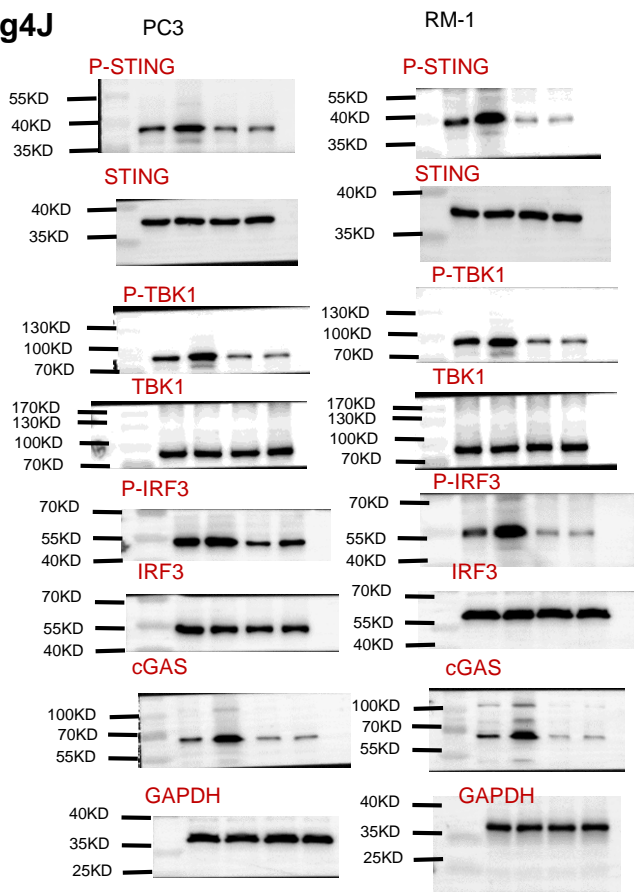**SFig7A**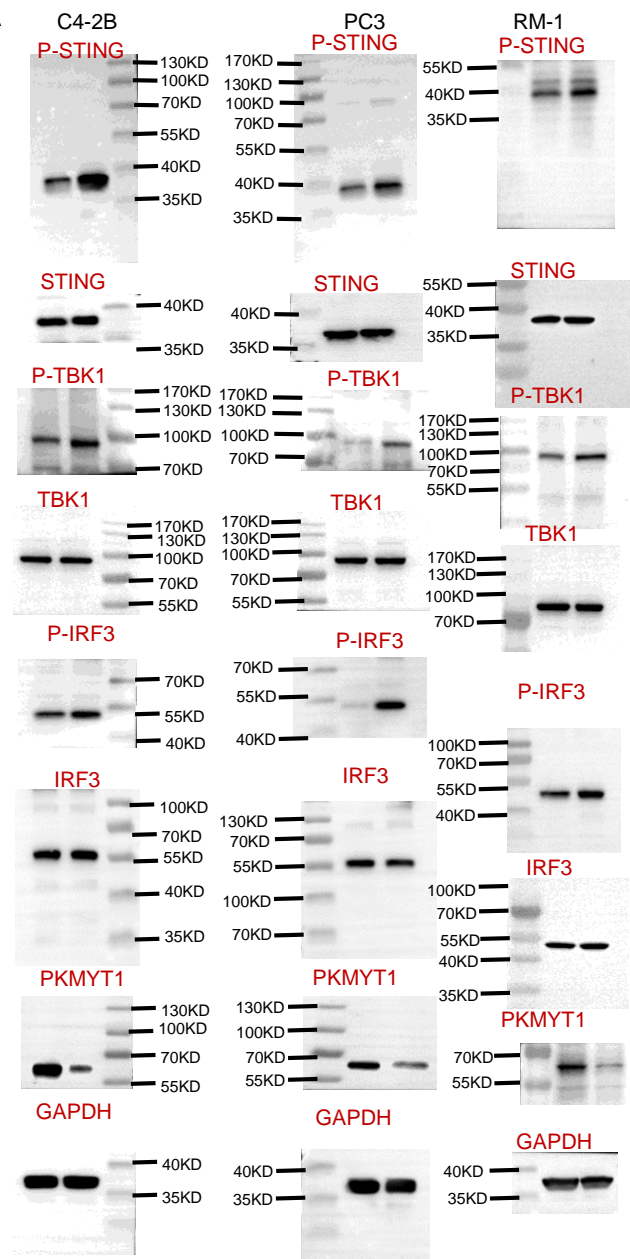**SFig5D**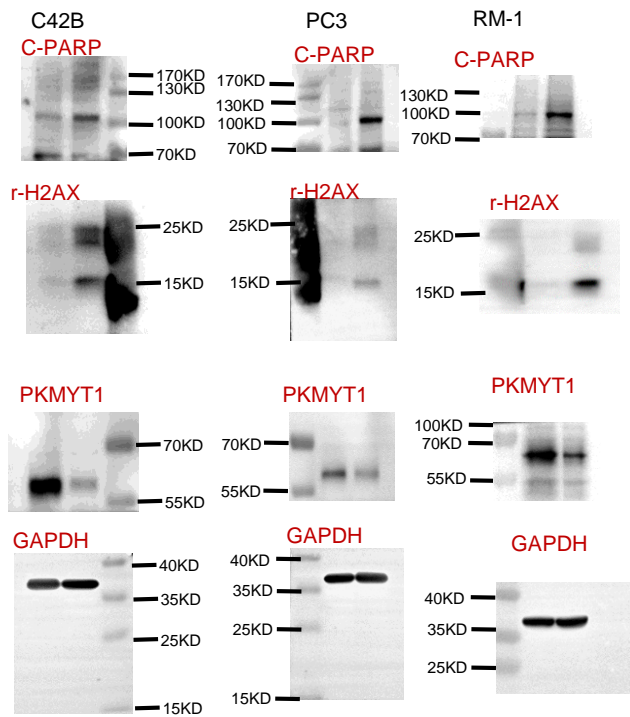

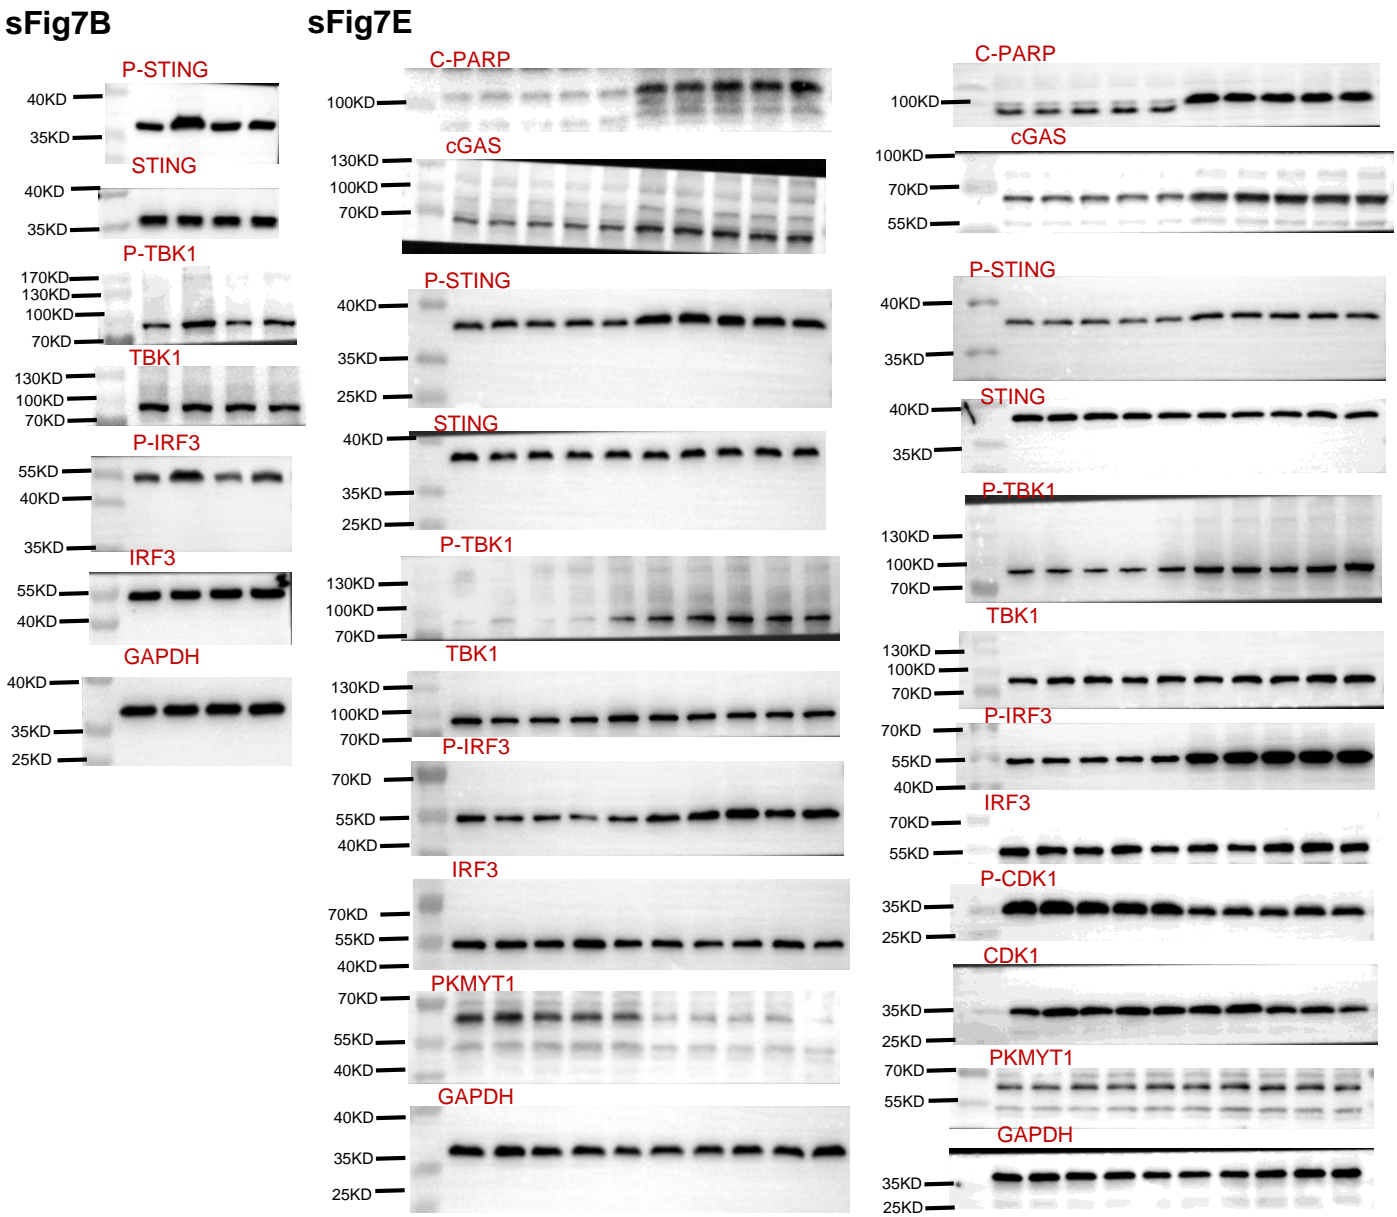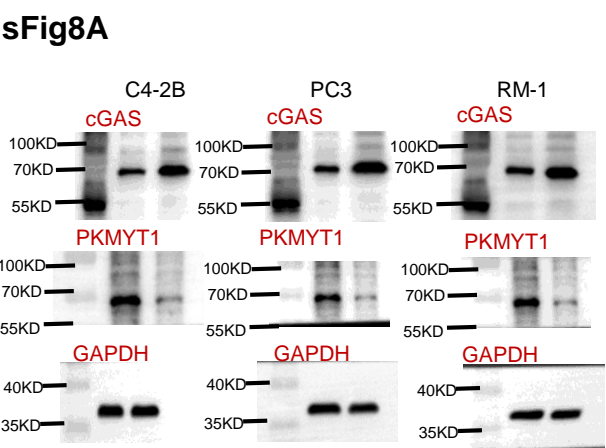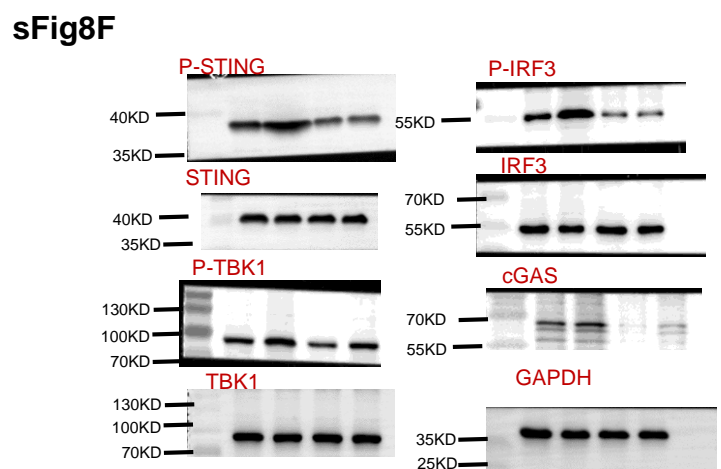

sFig9A

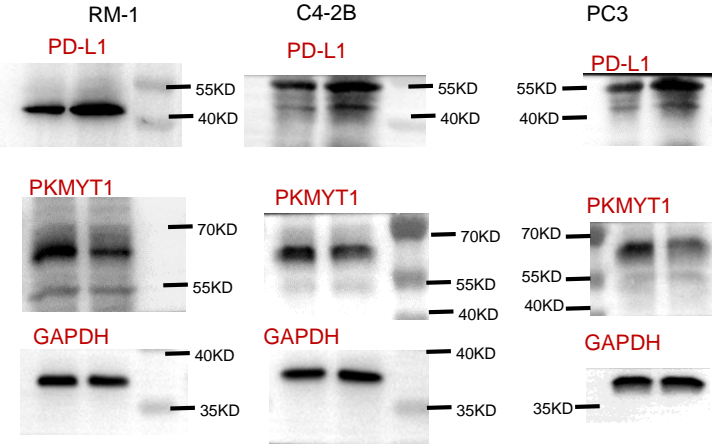

sFig9B

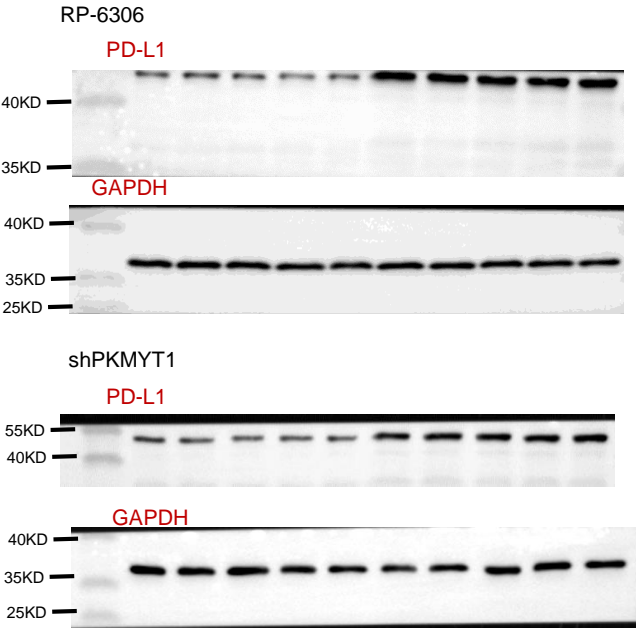

**Supplementary Table 1. Primers used in this study.**

| Gene         | Forward                   | Reverse                   |
|--------------|---------------------------|---------------------------|
| human CCL5   | TGCCCACATCAAGGAGTATTT     | CTTTCGGGTGACAAAGACG       |
| human CXCL10 | GGCCATCAAGAATTTACTGAAAGCA | TCTGTGTGGTCCATCCTTGGA     |
| human IFN-β  | CAACTTGCTTGGATTCTACAAAG   | TATTCAAGCCTCCCATTCAATTG   |
| human GAPDH  | GCACCGTCAAGGCTGAGAAC      | TGGTGAAGACGCCAGTGGA       |
| human IFN-α  | GACTCCATCTTGGCTGTGA       | TGATTTCTGCTCTGACAACCT     |
| mouse Ifn-α  | GGACTTTGGATTCCCGCAGGAGAAG | GCTGCATCAGACAGCCTTGCAGGTC |
| mouse Ifn-β  | CAGCTCCAAGAAAGGACGAAC     | GGCAGTGTAACCTCTTCTGCAT    |
| mouse Ccl5   | GCTGCTTTGCCTACCTCTCC      | TCGAGTGACAAACACGACTGC     |
| mouse Cxcl10 | CCAAGTGCTGCCGTCATTTTC     | GGCTCGCAGGGATGATTTCAA     |
| mouse Pkmyt1 | GTCTGTCTTCTGAGCTGCGT      | CTCAGCATGGGTAAGGCCAA      |
| human PKMYT1 | ATGCTAGAACGGCCTCCTG       | TTCTGCGTGGCGGAAGTAG       |
| human IFN-γ  | GAGTGTGGAGACCATCAAGGAAG   | TGCTTTGCGTTGGACATTCAAGTC  |
| mouse Ifn-γ  | ATGAACGCTACACACTGCATC     | CCATCCTTTTGCCAGTTCCCTC    |
| human cGAS   | TAACCCTGGCTTTGGAATCAAAA   | TGGGTACAAGGTAAAATGGCTTT   |
| mouse cgas   | GTTCAAACACAAGAAATGCACTG   | GCTGACGGAGTACACAATCCT     |
| human IFIT3  | AAAAGCCCAACAACCCAGAAT     | CGTATTGGTTATCAGGACTCAGC   |
| mouse Ifit3  | TGAACTGCTCAGCCACA         | TCCCGGTTGACCTCACTC        |
| human ISG15  | TGGACAAATGCGACGAACCTC     | TCAGCCGTACCTCGTAGGTG      |
| mouse Isg15  | GGAACGAAAGGGGCCACAGCA     | CCTCCATGGGCCTTCCCTCGA     |
| human IRF7   | GCACACACACATGCTGGACT      | TTGGTTGGGACTGGATCTGC      |
| mouse Irf7   | TCCAGTTGATCCGCATAAGGT     | CTTCCCTATTTTCCGTGGCTG     |
| human RSAD2  | CAGCGTCAACTATCACTTCACT    | AACTCTACTTTGCAGAACCTCAC   |
| mouse Rsad2  | TGCTGGCTGAGAATAGCATTAGG   | GCTGAGTGCTGTTCCCATCT      |
| mouse Gapdh  | AGGTCGGTGTGAACGGATTTG     | TGTAGACCATGTAGTTGAGGTCA   |

These primers were purchased from Biosune Biotechnology (Shanghai, China).



**Supplementary Table 2. Primary antibodies used in this study.**

| <b>Primary antibodies</b> | <b>Company</b>            | <b>Cat no.</b> |
|---------------------------|---------------------------|----------------|
| P-STING                   | Cell Signaling Technology | 19781          |
| STING                     | Cell Signaling Technology | 13647          |
| P-STING(Ms)               | Invitrogen                | PA5-105674     |
| P-TBK1                    | Cell Signaling Technology | 5483           |
| TBK1                      | Cell Signaling Technology | 3504           |
| P-IRF3                    | Cell Signaling Technology | 4947           |
| IRF3                      | Cell Signaling Technology | 4302           |
| P-CDK1                    | GeneTex                   | GTX133860      |
| CDK1                      | Abways Technology         | CY5061         |
| CDK1(Ms)                  | Abways Technology         | CY5177         |
| PKMYT1                    | Cell Signaling Technology | 4282           |
| r-H2AX                    | Cell Signaling Technology | 2577           |
| GAPDH                     | Abways Technology         | AB0037         |
| c-PARP                    | Abways Technology         | CY5265         |
| c-PARP(Ms)                | Abways Technology         | CY5035         |
| CD8                       | Cell Signaling Technology | 70306          |
| CD8(Ms)                   | Cell Signaling Technology | 98941          |
| cGAS                      | Proteintech               | 29958-1-AP     |
| PD-L1                     | Proteintech               | 17952-1-AP     |
| CCL5                      | Invitrogen                | 710001         |
| CXCL10                    | Proteintech               | 10937-1-AP     |

**Supplementary Table 3. siRNAs used in this study.**

| siRNA         | Sequence              |
|---------------|-----------------------|
| siPKMYT1      | GUGACAUCAACUCAGAGCCTT |
| siPKMYT1 (Ms) | GGCTCTGGACCATCTACATAG |
| siGAS         | CGUGAAGAUUUCUGCACCU   |
| siGAS (Ms)    | GGCCGAGACGGUGAAUAAATT |
| shNC          | GTTCTCCGAACGTGTCACGT  |
| shPKMYT1      | GTGACATCAACTCAGAGCC   |
| shGAS         | CCTCTTTAGGATTGTCAGAAT |

These siRNA were purchased from GenePharma (Shanghai, China).



**Supplementary Table 4. Gene list used for GSEA.**

HALLMARK\_INFLAMMATORY\_RESPONSE,  
REACTOM\_INTERFERON\_ALPHA\_BETA\_SIGNALING, STING pathways, et al. were obtained  
from GSEA (<http://software.broadinstitute.org/gsea/index.jsp>).  
PKMYT1\_SIGNATURE were TOP200 positive related to PKMYT1 expression in PCa obtained  
from GEPIA database.

| PKMYT1_SIGNATURE (200) |               |                |               |                |
|------------------------|---------------|----------------|---------------|----------------|
| CHTF18                 | TK1           | AC005606.15    | RP11-178L8.8  | RP11-671J11.5  |
| POLD1                  | RP4-738P15.6  | WDR34          | EDF1          | CTD-2540B15.11 |
| SAC3D1                 | CDC20         | NCAPH2         | SKIV2L        | PTTG1          |
| SPC24                  | INTS1         | HRAS           | TRAIP         | CDK5RAP3       |
| CEMP1                  | H2AFX         | ABCB6          | DNAJC7        | AC005943.6     |
| NUP85                  | WDR46         | MAP1S          | ZNF317        | CTB-43P18.1    |
| RP11-386G11.10         | EEF1D         | SART1          | RP13-131K19.2 | UQCC3          |
| SPAG5                  | GFER          | NSUN5P2        | TMEM160       | RPL35          |
| PSMG3                  | RP11-661A12.8 | RP11-548H3.1   | CITF22-1A6.3  | METTL12        |
| RP11-256P1.1           | NMRAL1        | NAT14          | RBM6          | AC005339.2     |
| NUDT1                  | RNF31         | POLE           | RP11-161H23.5 | AC074212.5     |
| ARAP1-AS1              | AURKAIP1      | ORAOV1         | GP1BB         | ROMO1          |
| BOLA2B                 | C16orf59      | ARMCX7P        | C6orf136      | CTB-129O4.1    |
| POLRMT                 | FANCA         | RP11-6N17.6    | CDC34         | RP11-304L19.13 |
| C9orf142               | AURKB         | RP11-63M22.2   | NDUFB11       | RP11-360L9.7   |
| DDX56                  | MAP2K2        | SULT1A3        | NDUFB7        | BCL7C          |
| C14orf80               | RPL28         | POLR2I         | AP003068.9    | DPP7           |
| BUD31                  | WDR13         | TACC3          | AC005306.3    | COX6B1         |
| RP11-498C9.13          | AC006547.8    | MRPS34         | NME3          | SYMPK          |
| LIG1                   | TYK2          | CPSF1          | TUBGCP2       | RP11-307C12.12 |
| FAM195A                | HCG25         | SLC4A2         | ABHD16B       | FAM50A         |
| C19orf43               | AC007192.6    | STUB1          | LRRC45        | ATP5D          |
| AC007308.7             | CTD-2589H19.6 | ATP5I          | RPP21         | CEP131         |
| LAMTOR4                | BRICD5        | RP11-498P14.3  | C19orf60      | C16orf13       |
| CTB-31O20.3            | RP11-368P15.3 | RP1-20B21.4    | NUP214        | RPL37P6        |
| RP11-109P14.10         | DROSHA        | TCEB2          | RP11-16E23.5  | RP11-264B17.2  |
| RPLP2                  | RP11-618K13.2 | RP11-566K11.5  | AC110615.1    | C20orf27       |
| C17orf89               | ARL6IP4       | SNRPA          | PPP1R35       | RP11-114H24.6  |
| SNRPD2                 | RAD54L        | RP11-574K11.32 | AC104534.3    | MRPL23         |
| FANCG                  | COMTD1        | RP11-697E22.1  | PSMB3         | CTD-2636A23.2  |
| AL513523.2             | ZNHIT1        | CTC-273B12.5   | RP13-39P12.3  | RP11-746M1.1   |
| LSM7                   | LINC01176     | RPS19          | SFXN4         | MRPL38         |
| AP001615.9             | C19orf24      | CTC-1337H24.4  | EIF3C         | RP3-508I15.18  |
| RP11-638I2.6           | SIGIRR        | SUPV3L1        | AC006011.4    | CTD-2510F5.6   |
| GADD45GIP1             | IRF3          | PAM16          | CDCA3         | LA16c-390E6.5  |
| DDX49                  | LAGE3         | QTRT1          | CCDC85B       | ITPA           |
| RP11-667K14.4          | E2F1          | NAA10          | RP11-298I3.5  | GMPSP1         |
| MXD3                   | RP11-756A22.7 | DNAJC9-AS1     | PRR14         | RP11-867G23.4  |
| RFXANK                 | NKX6-2        | MICALL2        | PNPLA6        | ASPSCR1        |
| TSEN54                 | MIIP          | PET100         | ZBTB48        | CDC45          |
